# Supplementary material for: The molecular and metabolic program by which white adipocytes adapt to cool physiologic temperatures
Source: PLOS journal article supplement (doi:10.1371/journal.pbio.3000988), 2021-05-12
Supplement: S2 (10.1371/journal.pbio.3000988.s002) [file journal.pbio.3000988.s002]

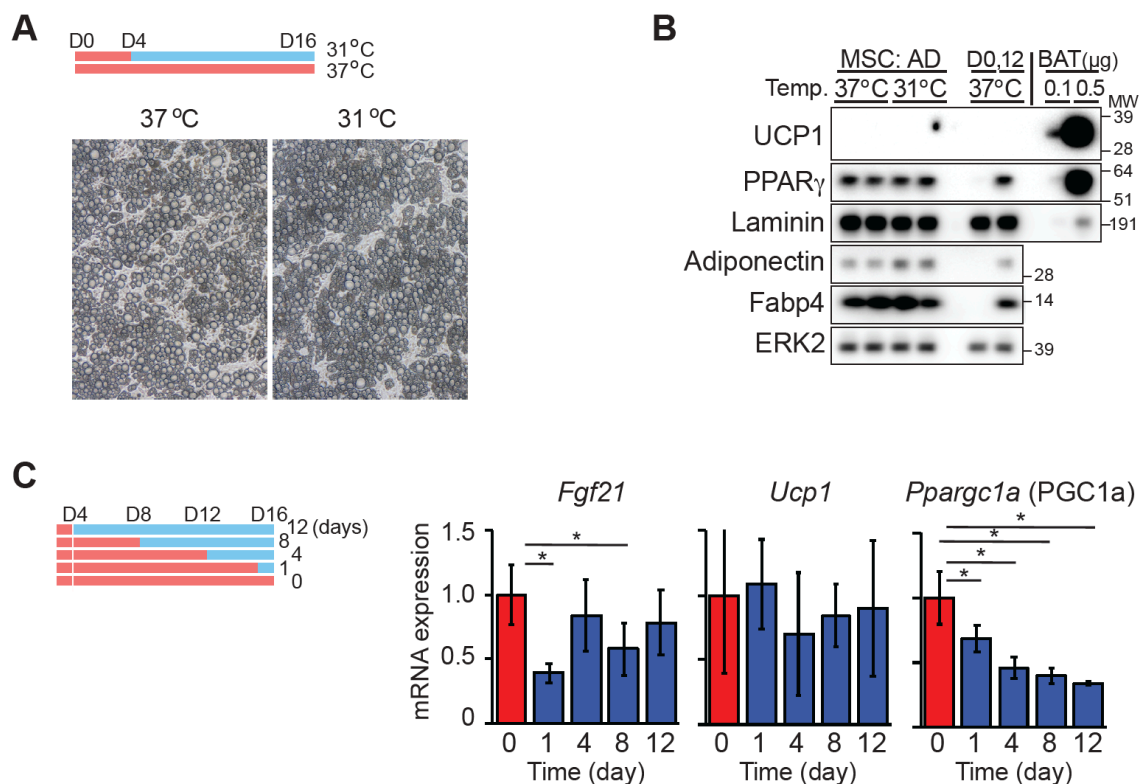

## S2 Fig

(A) Cultured MSC adipocytes adapt to 31°C without morphological changes. Four days after differentiation, adipocytes were moved to the indicated temperatures for 12 days.

(B) Adipocyte markers are expressed similarly between control cells cultured at 37°C and those incubated at 37°C from day 4 to 16. For adipocyte samples, 11 µg of protein lysate was analyzed per lane, whereas for brown adipose tissue, 0.1 or 0.5 µg lysate was included as a positive control for UCP1.

(C) Beige adipocyte markers were not induced by exposure of cultured adipocytes to 31°C for the indicated days ( $n = 6$ ). Gene expression was normalized to geometric mean value of *Hprt*, *Tbp*, *Ppia*, and was expressed relative to 37°C control (31°C for 0 day) ( $n = 4$ ). \* indicates significance at  $p < 0.05$ . Uncropped western blots are provided in S8 Raw Images, and numerical data for all graphs are provided in S2 Data.
