# Supplementary material for: The molecular and metabolic program by which white adipocytes adapt to cool physiologic temperatures
Source: PLoS Biol. 2021 May 12;19(5):e3000988. doi: 10.1371/journal.pbio.3000988 (PMC8143427; doi:10.1371/journal.pbio.3000988)
Supplement: S4 Data — All numerical raw data associated with Fig 4 and S4 Fig. The file contains multiple tabs with labels corresponding to the relevant figure. (XLSX) [file pbio.3000988.s012.xlsx]

## Sheet: Figure 4A, 4B
Unassigned Well
Unselected Well
OCR Data
ECAR Data
PER Data		4A											4B
OCR (pmol/min):
Time		Group Name: 37 14K normal					Group Name: 31 14K normal						Group Name: 37 14K normal					Group Name: 31 14K normal
		G02	G03	G04	G05		G08	G09	G10	G11			G02	G03	G04	G05		G08	G09	G10	G11
1.30832		103.579	97.3644	87.5294	96.2436		216.744	216.403	211.453	205.956			95.7999	152.528	197.174	125.997		381.41	361.758	337.089	248.557
7.78415		97.8674	94.4437	84.275	94.6096		215.271	209.964	216.104	202.623			95.955	151.798	193.678	123.649		383.856	371.39	350.14	258.37
14.2545		95.8103	93.6678	83.1926	92.5463		218.973	211.652	226.417	204.381			95.7355	153.087	196.85	123.241		385.384	381.019	354.015	268.294
20.7304		95.4254	94.3044	83.2551	93.2535		225.415	217.07	239.046	209.11			95.397	151.732	200.105	123.537		384.393	382.435	348.647	277.41
27.3216		85.75	81.824	76.4906	84.9562		212.96	206.418	212.007	196.622			90.9537	143.282	192.554	119.297		370.378	371.96	356.829	256.459
33.8012		83.498	78.779	76.5793	82.2927		207.705	198.275	226.663	191.603			89.8064	144.733	203.786	114.475		359.071	351.608	332.954	240.168
40.2701		83.0284	78.611	75.6942	80.9655		189.551	189.964	228.203	184.015			87.6061	143.149	207.273	108.989		355.137	343.844	318.728	228.996
46.7555		78.9791	75.7157	74.5989	78.5874		170.503	183.143	223.86	174.628			87.6327	144.106	210.026	107.5		354.691	344.833	316.065	223.452
53.3489		102.555	123.454	96.0476	123.326		494.355	387.395	348.593	360.583			172.385	192.106	173.306	242.11		316.36	273.352	314.079	292.22
59.8424		100.051	125.057	96.057	116.74		364.984	397.876	285.7	284.948			175.718	207.498	192.441	249.819		295.566	239.231	283.64	242.453
66.3226		96.7392	131.228	91.712	112.926		306.912	372.3	264.839	264.272			170.921	207.788	198.999	244.927		291.565	236.235	280.683	231.803
72.8034		96.761	136.626	91.6666	111.864		286.53	356.568	258.765	254.197			164.768	205.781	201.196	236.315		289.705	238.27	284.296	229.896
79.3905		50.9133	40.0707	48.2916	46.707		92.5415	82.9172	59.9199	90.6511			48.0119	69.2449	163.156	61.844		86.0128	111.572	82.4414	94.1502
85.8866		53.322	45.6324	51.1891	52.4088		99.2949	86.9497	71.2068	96.9412			54.485	81.2038	179.458	65.5632		91.077	115.43	89.723	97.6592
92.3767		55.8365	48.0932	54.7805	55.7172		101.673	89.0381	73.625	98.5734			55.7171	83.6584	187.877	67.4078		90.3948	115.46	89.4098	97.61
98.8651		53.9678	47.4644	53.699	55.5954		99.0582	85.1937	71.6151	95.4591			56.2142	82.1853	190.257	66.546		87.0818	111.464	85.2867	95.1954
OCR (pmol/min):		Before normalization
Time		Group Name: 37 14K normal					Group Name: 31 14K normal						Group Name: 37 14K normal					Group Name: 31 14K normal
		G02	G03	G04	G05		G08	G09	G10	G11			G02	G03	G04	G05		G08	G09	G10	G11
1.30832		134.114	127.703	111.46	129.217		270.236	301.882	308.299	288.133			134.465	196.12	255.103	165.837		529.398	520.642	474.959	350.216
7.78415		126.719	123.872	107.316	127.023		268.4	292.899	315.079	283.47			134.682	195.182	250.581	162.746		532.792	534.505	493.348	364.044
14.2545		124.055	122.855	105.937	124.253		273.016	295.255	330.116	285.93			134.374	196.839	254.685	162.209		534.914	548.363	498.807	378.026
20.7304		123.557	123.69	106.017	125.202		281.047	302.812	348.529	292.545			133.899	195.097	258.896	162.599		533.537	550.4	491.244	390.87
27.3216		111.029	107.32	97.4032	114.062		265.518	287.953	309.106	275.074			127.663	184.232	249.127	157.018		514.085	535.324	502.773	361.35
33.8012		108.113	103.327	97.516	110.486		258.967	276.593	330.474	268.053			126.052	186.098	263.658	150.672		498.391	506.034	469.132	338.397
40.2701		107.505	103.106	96.389	108.704		236.333	265	332.719	257.437			122.964	184.061	268.17	143.451		492.93	494.86	449.088	322.656
46.7555		102.262	99.3087	94.9942	105.511		212.583	255.485	326.388	244.304			123.001	185.291	271.731	141.491		492.311	496.284	445.336	314.843
53.3489		132.789	161.922	122.307	165.577		616.362	540.415	508.248	504.455			241.959	247.01	224.224	318.665		439.108	393.408	442.537	411.739
59.8424		129.547	164.025	122.319	156.735		455.062	555.038	416.55	398.643			246.637	266.801	248.98	328.812		410.246	344.301	399.649	341.617
66.3226		125.258	172.118	116.786	151.615		382.658	519.358	386.135	369.716			239.905	267.174	257.465	322.373		404.693	339.989	395.482	326.611
72.8034		125.286	179.198	116.728	150.189		357.246	497.412	377.279	355.622			231.269	264.593	260.307	311.038		402.11	342.918	400.573	323.923
79.3905		65.9225	52.5568	61.4945	62.7088		115.381	115.669	87.3633	126.821			67.3895	89.035	211.091	81.3991		119.386	160.575	116.16	132.658
85.8866		69.0413	59.8514	65.1842	70.3641		123.801	121.295	103.819	135.621			76.4751	104.412	232.183	86.2942		126.415	166.128	126.42	137.602
92.3767		72.297	63.079	69.7575	74.8059		126.766	124.208	107.345	137.904			78.2045	107.568	243.075	88.7221		125.468	166.17	125.978	137.533
98.8651		69.8775	62.2543	68.3803	74.6423		123.506	118.845	104.415	133.547			78.9022	105.674	246.154	87.5878		120.869	160.419	120.169	134.13

## Sheet: Figure 4D, 4E
																							Column1	m+0	m+1	m+2	m+3	m+4	m+5	m+6	Sum		Column1
Figure 4D																																	37- Gluc
F6P/G6P		Corrected Abundance																					Mean	45.0912	0.860158	0	0	1.30679	0	52.7419	100		Mean	16.6939	0.685207	0	82.621
																							Standard Error	5.57206	0.4304	0	0	1.30679	0	6.94314	0		Standard Error	4.40174	0.386189	0	4.78603
		259.022	260.026	261.029	262.033	263.036	264.039	265.043	Abund														Median	48.1395	1.26147	0	0	0	0	50.5416	100		Median	17.9803	0.719113	0	81.3006
File Name	Sample	m+0	m+1	m+2	m+3	m+4	m+5	m+6	Sum														Mode	#N/A	#N/A	0	0	0	0	#N/A	100		Mode	#N/A	#N/A	0	#N/A
20180920-EX00881-A013-IN0016-P1-CS0000091-1-N.d	Pool	1997786	29917	0	0	0	3785	0	2031487														Standard Deviation	9.65109	0.745474	0	0	2.26344	0	12.0259	0		Standard Deviation	7.62404	0.668899	0	8.28964
20180920-EX00881-A013-IN0016-P1-CS0000091-2-N.d	Pool	1935430	15738	0	0	0	0	0	1951168														Sample Variance	93.1435	0.555732	0	0	5.12314	0	144.622	0		Sample Variance	58.126	0.447425	0	68.7182
20180920-EX00881-A013-IN0016-P1-CS0000091-3-N.d	Pool	1986073	35685	0	0	0	0	0	2021758														Kurtosis	#DIV/0!	#DIV/0!	#DIV/0!	#DIV/0!	#DIV/0!	#DIV/0!	#DIV/0!	#DIV/0!		Kurtosis	#DIV/0!	#DIV/0!	#DIV/0!	#DIV/0!
20180920-EX00881-A013-IN0016-P1-CS0000091-4-N.d	Pool	1982840	24771	0	0	0	0	0	2007610														Skewness	-1.27952	-1.72045	#DIV/0!	#DIV/0!	1.73205	#DIV/0!	0.795768	#DIV/0!		Skewness	-0.737686	-0.227515	#DIV/0!	0.698578
20180920-EX00881-A013-IN0016-P1-CS0000091-5-N.d	Pool	2027236	33090	0	0	0	18041	0	2078367														Range	18.566	1.319	0	0	3.92038	0	23.7479	0		Range	15.0844	1.33651	0	16.4208
											m+0	m+1	m+2	m+3	m+4	m+5	m+6						Minimum	34.284	0	0	0	0	0	41.9681	100		Minimum	8.50843	0	0	75.0708
20180920-EX00881-A013-IN0016-S00035901-N.d	Glucose 37	680602	0	0	0	0	0	1304584	1985186		34.284	0	0	0	0	0	65.716	100	0				Maximum	52.8501	1.319	0	0	3.92038	0	65.716	100		Maximum	23.5928	1.33651	0	91.4916
20180920-EX00881-A013-IN0016-S00035902-N.d	Glucose 37	888588	24347	0	0	0	0	932928	1845862		48.1395	1.319	0	0	0	0	50.5416	100					Sum	135.274	2.58048	0	0	3.92038	0	158.226	300		Sum	50.0816	2.05562	0	247.863
20180920-EX00881-A013-IN0016-S00035903-N.d	Glucose 37	1124855	26849	0	0	83441	0	893243	2128388		52.8501	1.26147	0	0	3.92038	0	41.9681	100					Count	3	3	3	3	3	3	3	3		Count	3	3	3	3
20180920-EX00881-A013-IN0016-S00035904-N.d	Glucose 31	563230	17611	0	0	0	0	0	580841		96.968	3.03198	0	0	0	0	0	100						1.38549e+19										6.27415e+86
20180920-EX00881-A013-IN0016-S00035905-N.d	Glucose 31	1364360	29097	0	0	81125	0	0	1474582		92.5252	1.97324	0	0	5.50156	0	0	100					Column1										Column1
20180920-EX00881-A013-IN0016-S00035906-N.d	Glucose 31	2688411	52904	0	0	0	0	0	2741315		98.0701	1.92988	0	0	0	0	0	100															31-Gluc
20180920-EX00881-A013-IN0016-S00035907-N.d	Pyruvate 37	3683321	33267	0	0	0	0	0	3716588		99.1049	0.895095	0	0	0	0	0	100					Mean	95.8544	2.3117	0	0	1.83385	0	0	100		Mean	42.4115	2.30137	0	55.2872
20180920-EX00881-A013-IN0016-S00035908-N.d	Pyruvate 37	3402736	27557	0	0	0	0	0	3430293		99.1967	0.803342	0	0	0	0	0	100					Standard Error	1.69475	0.360359	0	0	1.83385	0	0	0		Standard Error	10.1427	0.168335	0	9.97654
20180920-EX00881-A013-IN0016-S00035909-N.d	Pyruvate 37	2573173	29161	0	0	0	0	0	2602333		98.8795	1.12057	0	0	0	0	0	100					Median	96.968	1.97324	0	0	0	0	0	100		Median	37.7511	2.32644	0	59.9224
20180920-EX00881-A013-IN0016-S00035910-N.d	Pyruvate 31	2883271	31298	0	0	0	0	0	2914569		98.9262	1.07385	0	0	0	0	0	100					Mode	#N/A	#N/A	0	0	0	0	0	100		Mode	#N/A	#N/A	0	#N/A
20180920-EX00881-A013-IN0016-S00035911-N.d	Pyruvate 31	2357415	40244	0	0	0	0	0	2397659		98.3215	1.67847	0	0	0	0	0	100					Standard Deviation	2.9354	0.624161	0	0	3.17633	0	0	0		Standard Deviation	17.5676	0.291565	0	17.2799
20180920-EX00881-A013-IN0016-S00035912-N.d	Pyruvate 31	2875153	37767	0	0	0	0	0	2912920		98.7035	1.29653	0	0	0	0	0	100					Sample Variance	8.61656	0.389577	0	0	10.0891	0	0	0		Sample Variance	308.622	0.0850102	0	298.594
20180920-EX00881-A013-IN0016-S00035913-N.d	Glutamine 37	4900455	41811	0	0	0	0	0	4942265		99.154	0.845989	0	0	0	0	0	100					Kurtosis	#DIV/0!	#DIV/0!	#DIV/0!	#DIV/0!	#DIV/0!	#DIV/0!	#DIV/0!	#DIV/0!		Kurtosis	#DIV/0!	#DIV/0!	#DIV/0!	#DIV/0!
20180920-EX00881-A013-IN0016-S00035914-N.d	Glutamine 37	3546447	46756	0	0	0	0	0	3593203		98.6988	1.30123	0	0	0	0	0	100					Skewness	-1.46144	1.72265	#DIV/0!	#DIV/0!	1.73205	#DIV/0!	#DIV/0!	#DIV/0!		Skewness	1.10977	-0.384204	#DIV/0!	-1.12024
20180920-EX00881-A013-IN0016-S00035915-N.d	Glutamine 37	3584827	23363	0	0	0	0	0	3608189		99.3525	0.647499	0	0	0	0	0	100					Range	5.54492	1.10211	0	0	5.50156	0	0	0		Range	34.1955	0.58151	0	33.6143
20180920-EX00881-A013-IN0016-S00035916-N.d	Glutamine 31	3230057	34370	0	0	0	0	0	3264427		98.9471	1.05286	0	0	0	0	0	100					Minimum	92.5252	1.92988	0	0	0	0	0	100		Minimum	27.644	1.99807	0	36.1625
20180920-EX00881-A013-IN0016-S00035917-N.d	Glutamine 31	3346097	37952	0	0	0	0	0	3384048		98.8785	1.1215	0	0	0	0	0	100					Maximum	98.0701	3.03198	0	0	5.50156	0	0	100		Maximum	61.8395	2.57958	0	69.7767
20180920-EX00881-A013-IN0016-S00035918-N.d	Glutamine 31	2865590	32068	0	0	0	0	0	2897658		98.8933	1.10669	0	0	0	0	0	100					Sum	287.563	6.9351	0	0	5.50156	0	0	300		Sum	127.235	6.9041	0	165.862
																							Count	3	3	3	3	3	3	3	3		Count	3	3	3	3
																								1.38549e+19										6.27415e+86
																							Column1										Column1
Figure 4E																																	37-Pyr
2PG / 3PG		Corrected Abundance																					Mean	99.0603	0.93967	0	0	0	0	0	100		Mean	99.629	0.371033	0	0
																							Standard Error	0.0942369	0.0942492	0	0	0	0	0	0		Standard Error	0.219557	0.219557	0	0
		184.986	185.989	186.992	187.996	Abund																	Median	99.1049	0.895095	0	0	0	0	0	100		Median	99.6792	0.320848	0	0
File Name	Sample	m+0	m+1	m+2	m+3	Sum																	Mode	#N/A	#N/A	0	0	0	0	0	100		Mode	#N/A	#N/A	0	0
20180920-EX00881-A013-IN0016-P1-CS0000091-1-N.d	Pool	454917	369	0	222279	677565																	Standard Deviation	0.163223	0.163244	0	0	0	0	0	0		Standard Deviation	0.380285	0.380285	0	0
20180920-EX00881-A013-IN0016-P1-CS0000091-2-N.d	Pool	423785	4552	0	205021	633357																	Sample Variance	0.0266418	0.0266487	0	0	0	0	0	0		Sample Variance	0.144616	0.144616	0	0
20180920-EX00881-A013-IN0016-P1-CS0000091-3-N.d	Pool	438005	4166	0	209478	651649																	Kurtosis	#DIV/0!	#DIV/0!	#DIV/0!	#DIV/0!	#DIV/0!	#DIV/0!	#DIV/0!	#DIV/0!		Kurtosis	#DIV/0!	#DIV/0!	#DIV/0!	#DIV/0!
20180920-EX00881-A013-IN0016-P1-CS0000091-4-N.d	Pool	431343	5659	0	207053	644055																	Skewness	-1.13698	1.13713	#DIV/0!	#DIV/0!	#DIV/0!	#DIV/0!	#DIV/0!	#DIV/0!		Skewness	-0.583508	0.583508	#DIV/0!	#DIV/0!
20180920-EX00881-A013-IN0016-P1-CS0000091-5-N.d	Pool	444070	4302	0	209616	657988																	Range	0.317191	0.317229	0	0	0	0	0	0		Range	0.755586	0.755586	0	0
								m+0	m+1	m+2	m+3												Minimum	98.8795	0.803342	0	0	0	0	0	100		Minimum	99.2261	0.0183329	0	0
20180920-EX00881-A013-IN0016-S00035901-N.d	Glucose 37	37031	0	0	398196	435227	37- Gluc	8.50843	0	0	91.4916	100											Maximum	99.1967	1.12057	0	0	0	0	0	100		Maximum	99.9817	0.773919	0	0
20180920-EX00881-A013-IN0016-S00035902-N.d	Glucose 37	130618	5224	0	590609	726451	37- Gluc	17.9803	0.719113	0	81.3006	100											Sum	297.181	2.81901	0	0	0	0	0	300		Sum	298.887	1.1131	0	0
20180920-EX00881-A013-IN0016-S00035903-N.d	Glucose 37	215450	12205	0	685547	913201	37- Gluc	23.5928	1.33651	0	75.0708	100											Count	3	3	3	3	3	3	3	3		Count	3	3	3	3
20180920-EX00881-A013-IN0016-S00035904-N.d	Glucose 31	83985	7837	0	211988	303809	31-Gluc	27.644	2.57958	0	69.7767	100												1.38549e+19										6.27415e+86
20180920-EX00881-A013-IN0016-S00035905-N.d	Glucose 31	136274	8398	0	216308	360980	31-Gluc	37.7511	2.32644	0	59.9224	100											Column1										Column1
20180920-EX00881-A013-IN0016-S00035906-N.d	Glucose 31	345614	11167	0	202108	558889	31-Gluc	61.8395	1.99807	0	36.1625	100																					31-Pyr
20180920-EX00881-A013-IN0016-S00035907-N.d	Pyruvate 37	1024803	7993	0	0	1032796	37-Pyr	99.2261	0.773919	0	0	100											Mean	98.6504	1.34962	0	0	0	0	0	100		Mean	99.4499	0.550096	0	0
20180920-EX00881-A013-IN0016-S00035908-N.d	Pyruvate 37	1093882	3521	0	0	1097403	37-Pyr	99.6792	0.320848	0	0	100											Standard Error	0.176546	0.176546	0	0	0	0	0	0		Standard Error	0.280616	0.280616	0	0
20180920-EX00881-A013-IN0016-S00035909-N.d	Pyruvate 37	888949	163	0	0	889112	37-Pyr	99.9817	0.0183329	0	0	100											Median	98.7035	1.29653	0	0	0	0	0	100		Median	99.2712	0.728799	0	0
20180920-EX00881-A013-IN0016-S00035910-N.d	Pyruvate 31	472247	3467	0	0	475714	31-Pyr	99.2712	0.728799	0	0	100											Mode	#N/A	#N/A	0	0	0	0	0	100		Mode	#N/A	#N/A	0	0
20180920-EX00881-A013-IN0016-S00035911-N.d	Pyruvate 31	295588	0	0	0	295588	31-Pyr	100	0	0	0	100											Standard Deviation	0.305787	0.305787	0	0	0	0	0	0		Standard Deviation	0.486042	0.486042	0	0
20180920-EX00881-A013-IN0016-S00035912-N.d	Pyruvate 31	366213	3406	0	0	369619	31-Pyr	99.0785	0.921489	0	0	100											Sample Variance	0.0935059	0.0935059	0	0	0	0	0	0		Sample Variance	0.236237	0.236237	0	0
20180920-EX00881-A013-IN0016-S00035913-N.d	Glutamine 37	1692560	9814	0	0	1702374	37-Gln	99.4235	0.576489	0	0	100											Kurtosis	#DIV/0!	#DIV/0!	#DIV/0!	#DIV/0!	#DIV/0!	#DIV/0!	#DIV/0!	#DIV/0!		Kurtosis	#DIV/0!	#DIV/0!	#DIV/0!	#DIV/0!
20180920-EX00881-A013-IN0016-S00035914-N.d	Glutamine 37	1230859	8043	0	0	1238902	37-Gln	99.3508	0.649204	0	0	100											Skewness	-0.757635	0.757635	#DIV/0!	#DIV/0!	#DIV/0!	#DIV/0!	#DIV/0!	#DIV/0!		Skewness	1.43086	-1.43086	#DIV/0!	#DIV/0!
20180920-EX00881-A013-IN0016-S00035915-N.d	Glutamine 37	1105802	2929	0	0	1108731	37-Gln	99.7358	0.264176	0	0	100											Range	0.604624	0.604624	0	0	0	0	0	0		Range	0.921489	0.921489	0	0
20180920-EX00881-A013-IN0016-S00035916-N.d	Glutamine 31	376991	295	0	0	377286	31-Gln	99.9218	0.07819	0	0	100											Minimum	98.3215	1.07385	0	0	0	0	0	100		Minimum	99.0785	0	0	0
20180920-EX00881-A013-IN0016-S00035917-N.d	Glutamine 31	279550	0	0	0	279550	31-Gln	100	0	0	0	100											Maximum	98.9262	1.67847	0	0	0	0	0	100		Maximum	100	0.921489	0	0
20180920-EX00881-A013-IN0016-S00035918-N.d	Glutamine 31	385876	2679	0	0	388555	31-Gln	99.3105	0.689478	0	0	100											Sum	295.951	4.04885	0	0	0	0	0	300		Sum	298.35	1.65029	0	0
																							Count	3	3	3	3	3	3	3	3		Count	3	3	3	3
																								1.38549e+19										6.27415e+86
																							Column1										Column1
																																	37-Gln
																							Mean	99.0684	0.931574	0	0	0	0	0	100		Mean	99.5034	0.496623	0	0
																							Standard Error	0.193516	0.193508	0	0	0	0	0	0		Standard Error	0.118104	0.118104	0	0
																							Median	99.154	0.845989	0	0	0	0	0	100		Median	99.4235	0.576489	0	0
																							Mode	#N/A	#N/A	0	0	0	0	0	100		Mode	#N/A	#N/A	0	0
																							Standard Deviation	0.33518	0.335166	0	0	0	0	0	0		Standard Deviation	0.204562	0.204562	0	0
																							Sample Variance	0.112346	0.112336	0	0	0	0	0	0		Sample Variance	0.0418456	0.0418456	0	0
																							Kurtosis	#DIV/0!	#DIV/0!	#DIV/0!	#DIV/0!	#DIV/0!	#DIV/0!	#DIV/0!	#DIV/0!		Kurtosis	#DIV/0!	#DIV/0!	#DIV/0!	#DIV/0!
																							Skewness	-1.07417	1.07416	#DIV/0!	#DIV/0!	#DIV/0!	#DIV/0!	#DIV/0!	#DIV/0!		Skewness	1.4891	-1.4891	#DIV/0!	#DIV/0!
																							Range	0.653763	0.653735	0	0	0	0	0	0		Range	0.385028	0.385028	0	0
																							Minimum	98.6988	0.647499	0	0	0	0	0	100		Minimum	99.3508	0.264176	0	0
																							Maximum	99.3525	1.30123	0	0	0	0	0	100		Maximum	99.7358	0.649204	0	0
																							Sum	297.205	2.79472	0	0	0	0	0	300		Sum	298.51	1.48987	0	0
																							Count	3	3	3	3	3	3	3	3		Count	3	3	3	3
																								1.38549e+19										6.27415e+86
																							Column1										Column1
																																	31-Gln
																							Mean	98.9063	1.09368	0	0	0	0	0	100		Mean	99.7441	0.255889	0	0
																							Standard Error	0.0208455	0.0208521	0	0	0	0	0	0		Standard Error	0.217966	0.217966	0	0
																							Median	98.8933	1.10669	0	0	0	0	0	100		Median	99.9218	0.07819	0	0
																							Mode	#N/A	#N/A	0	0	0	0	0	100		Mode	#N/A	#N/A	0	0
																							Standard Deviation	0.0361055	0.0361169	0	0	0	0	0	0		Standard Deviation	0.377528	0.377528	0	0
																							Sample Variance	0.00130361	0.00130443	0	0	0	0	0	0		Sample Variance	0.142528	0.142528	0	0
																							Kurtosis	#DIV/0!	#DIV/0!	#DIV/0!	#DIV/0!	#DIV/0!	#DIV/0!	#DIV/0!	#DIV/0!		Kurtosis	#DIV/0!	#DIV/0!	#DIV/0!	#DIV/0!
																							Skewness	1.41125	-1.41019	#DIV/0!	#DIV/0!	#DIV/0!	#DIV/0!	#DIV/0!	#DIV/0!		Skewness	-1.64884	1.64884	#DIV/0!	#DIV/0!
																							Range	0.0686028	0.0686324	0	0	0	0	0	0		Range	0.689478	0.689478	0	0
																							Minimum	98.8785	1.05286	0	0	0	0	0	100		Minimum	99.3105	0	0	0
																							Maximum	98.9471	1.1215	0	0	0	0	0	100		Maximum	100	0.689478	0	0
																							Sum	296.719	3.28105	0	0	0	0	0	300		Sum	299.232	0.767668	0	0
																							Count	3	3	3	3	3	3	3	3		Count	3	3	3	3
																								1.38549e+19										6.27415e+86
																																		m+0	m+1	m+2	m+3
																							45.0912	0.860158	0	0	1.30679	0	52.7419	100		37- Gluc	Mean	16.6939	0.685207	0	82.621
																							95.8544	2.3117	0	0	1.83385	0	0	100		31-Gluc	Mean	42.4115	2.30137	0	55.2872
																							99.0603	0.93967	0	0	0	0	0	100		37-Pyr	Mean	99.629	0.371033	0	0
																							98.6504	1.34962	0	0	0	0	0	100		31-Pyr	Mean	99.4499	0.550096	0	0
																							99.0684	0.931574	0	0	0	0	0	100		37-Gln	Mean	99.5034	0.496623	0	0
																							98.9063	1.09368	0	0	0	0	0	100		31-Gln	Mean	99.7441	0.255889	0	0
																							9.65109	0.745474	0	0	2.26344	0	12.0259	0
																							2.9354	0.624161	0	0	3.17633	0	0	0		37- Gluc	Standard Deviation	7.62404	0.668899	0	8.28964
																							0.163223	0.163244	0	0	0	0	0	0		31-Gluc	Standard Deviation	17.5676	0.291565	0	17.2799
																							0.305787	0.305787	0	0	0	0	0	0		37-Pyr	Standard Deviation	0.380285	0.380285	0	0
																							0.33518	0.335166	0	0	0	0	0	0		31-Pyr	Standard Deviation	0.486042	0.486042	0	0
																							0.0361055	0.0361169	0	0	0	0	0	0		37-Gln	Standard Deviation	0.204562	0.204562	0	0
																							3	3	3	3	3	3	3	3		31-Gln	Standard Deviation	0.377528	0.377528	0	0

## Sheet: Figure 4F
														Column1
														37- Gluc
Lactate		Corrected Abundance												Mean	21.059	1.09183	0.765403	77.0838
														Standard Error	0.870476	0.585712	0.471495	1.86298
		89.0244	90.0278	91.0311	92.0345	Abund								Median	20.305	1.27018	0.671094	77.7537
File Name	Sample	m+0	m+1	m+2	m+3	Sum								Mode	#N/A	#N/A	#N/A	#N/A
20180920-EX00881-A013-IN0016-P1-CS0000091-1-N.d	Pool	3981631	123630	162407	3106391	7374060								Standard Deviation	1.50771	1.01448	0.816653	3.22678
20180920-EX00881-A013-IN0016-P1-CS0000091-2-N.d	Pool	3929121	112932	160077	2954588	7156717								Sample Variance	2.27318	1.02917	0.666921	10.4121
20180920-EX00881-A013-IN0016-P1-CS0000091-3-N.d	Pool	3801014	103481	150550	2909463	6964507								Kurtosis	#DIV/0!	#DIV/0!	#DIV/0!	#DIV/0!
20180920-EX00881-A013-IN0016-P1-CS0000091-4-N.d	Pool	3683947	112393	158301	2791329	6745969								Skewness	1.68761	-0.766665	0.512744	-0.894036
20180920-EX00881-A013-IN0016-P1-CS0000091-5-N.d	Pool	4001338	117591	164262	3077540	7360730								Range	2.71794	2.00531	1.62512	6.34838
								m+0	m+1	m+2	m+3	Sum		Minimum	20.077	0	0	73.5746
20180920-EX00881-A013-IN0016-S00035901-N.d	Glucose 37	1751369	0	0	6971887	8723255	37- Gluc	20.077	0	0	79.923	100		Maximum	22.795	2.00531	1.62512	79.923
20180920-EX00881-A013-IN0016-S00035902-N.d	Glucose 37	3639864	227692	120300	13938110	17925965	37- Gluc	20.305	1.27018	0.671094	77.7537	100		Sum	63.1769	3.27549	2.29621	231.251
20180920-EX00881-A013-IN0016-S00035903-N.d	Glucose 37	9113303	801713	649713	29414750	39979480	37- Gluc	22.795	2.00531	1.62512	73.5746	100		Count	3	3	3	3
20180920-EX00881-A013-IN0016-S00035904-N.d	Glucose 31	717296	0	0	586303	1303598	31-Gluc	55.0243	0	0	44.9758	100			3.35482e-214
20180920-EX00881-A013-IN0016-S00035905-N.d	Glucose 31	1178695	0	0	1637296	2815991	31-Gluc	41.8572	0	0	58.1428	100		Column1
20180920-EX00881-A013-IN0016-S00035906-N.d	Glucose 31	3897030	159298	145576	2909297	7111202	31-Gluc	54.8013	2.2401	2.04714	40.9115	100		31-Gluc
20180920-EX00881-A013-IN0016-S00035907-N.d	Pyruvate 37	2404397	29537	154609	0	2588543	37-Pyr	92.8861	1.14107	5.97282	0	100		Mean	50.5609	0.7467	0.682379	48.01
20180920-EX00881-A013-IN0016-S00035908-N.d	Pyruvate 37	4856601	53009	283507	0	5193117	37-Pyr	93.52	1.02075	5.45928	0	100		Standard Error	4.35234	0.7467	0.682379	5.20047
20180920-EX00881-A013-IN0016-S00035909-N.d	Pyruvate 37	7641808	71031	324603	0	8037441	37-Pyr	95.0776	0.883751	4.03864	0	100		Median	54.8013	0	0	44.9758
20180920-EX00881-A013-IN0016-S00035910-N.d	Pyruvate 31	1410115	9340	233009	0	1652464	31-Pyr	85.3341	0.565217	14.1007	0	100		Mode	#N/A	0	0	#N/A
20180920-EX00881-A013-IN0016-S00035911-N.d	Pyruvate 31	5159709	47547	221714	0	5428970	31-Pyr	95.0403	0.875801	4.08391	0	100		Standard Deviation	7.53848	1.29332	1.18191	9.00748
20180920-EX00881-A013-IN0016-S00035912-N.d	Pyruvate 31	3800555	34703	78729	0	3913987	31-Pyr	97.1019	0.886641	2.01148	0	100		Sample Variance	56.8287	1.67268	1.39692	81.1347
20180920-EX00881-A013-IN0016-S00035913-N.d	Glutamine 37	4348414	48301	0	0	4396715	37-Gln	98.9014	1.09857	0	0	100		Kurtosis	#DIV/0!	#DIV/0!	#DIV/0!	#DIV/0!
20180920-EX00881-A013-IN0016-S00035914-N.d	Glutamine 37	3812678	24180	0	0	3836858	37-Gln	99.3698	0.630203	0	0	100		Skewness	-1.73035	1.73205	1.73205	1.34386
20180920-EX00881-A013-IN0016-S00035915-N.d	Glutamine 37	12629830	101609	0	46127	12777563	37-Gln	98.8438	0.795214	0	0.361	100		Range	13.1671	2.2401	2.04714	17.2313
20180920-EX00881-A013-IN0016-S00035916-N.d	Glutamine 31	1648388	0	0	0	1648388	31-Gln	100	0	0	0	100		Minimum	41.8572	0	0	40.9115
20180920-EX00881-A013-IN0016-S00035917-N.d	Glutamine 31	3110063	38391	0	0	3148453	31-Gln	98.7807	1.21936	0	0	100		Maximum	55.0243	2.2401	2.04714	58.1428
20180920-EX00881-A013-IN0016-S00035918-N.d	Glutamine 31	4284950	29379	0	25809	4340138	31-Gln	98.7284	0.676914	0	0.594659	100		Sum	151.683	2.2401	2.04714	144.03
									m+0	m+1	m+2	m+3		Count	3	3	3	3
															3.35482e-214
								37- Gluc	21.059	1.09183	0.765403	77.0838		Column1
								31-Gluc	50.5609	0.7467	0.682379	48.01		37-Pyr
								37-Pyr	93.8279	1.01519	5.15691	0		Mean	93.8279	1.01519	5.15691	0
								31-Pyr	92.4921	0.775886	6.73203	0		Standard Error	0.651102	0.0743326	0.578457	0
								37-Gln	99.0383	0.841329	0	0.120333		Median	93.52	1.02075	5.45928	0
								31-Gln	99.1697	0.632092	0	0.19822		Mode	#N/A	#N/A	#N/A	0
														Standard Deviation	1.12774	0.128748	1.00192	0
								37- Gluc	1.50771	1.01448	0.816653	3.22678		Sample Variance	1.2718	0.016576	1.00384	0
								31-Gluc	7.53848	1.29332	1.18191	9.00748		Kurtosis	#DIV/0!	#DIV/0!	#DIV/0!	#DIV/0!
								37-Pyr	1.12774	0.128748	1.00192	0		Skewness	1.13714	-0.194109	-1.23437	#DIV/0!
								31-Pyr	6.28413	0.182526	6.46504	0		Range	2.19151	0.257315	1.93418	0
								37-Gln	0.288488	0.237564	0	0.208423		Minimum	92.8861	0.883751	4.03864	0
								31-Gln	0.719536	0.610915	0	0.343326		Maximum	95.0776	1.14107	5.97282	0
														Sum	281.484	3.04557	15.4707	0
														Count	3	3	3	3
															3.35482e-214
														Column1
														31-Pyr
														Mean	92.4921	0.775886	6.73203	0
														Standard Error	3.62814	0.105381	3.73259	0
														Median	95.0403	0.875801	4.08391	0
														Mode	#N/A	#N/A	#N/A	0
														Standard Deviation	6.28413	0.182526	6.46504	0
														Sample Variance	39.4903	0.0333157	41.7967	0
														Kurtosis	#DIV/0!	#DIV/0!	#DIV/0!	#DIV/0!
														Skewness	-1.5247	-1.72518	1.53398	#DIV/0!
														Range	11.7678	0.321424	12.0892	0
														Minimum	85.3341	0.565217	2.01148	0
														Maximum	97.1019	0.886641	14.1007	0
														Sum	277.476	2.32766	20.1961	0
														Count	3	3	3	3
															3.35482e-214
														Column1
														37-Gln
														Mean	99.0383	0.841329	0	0.120333
														Standard Error	0.166558	0.137158	0	0.120333
														Median	98.9014	0.795214	0	0
														Mode	#N/A	#N/A	0	0
														Standard Deviation	0.288488	0.237564	0	0.208423
														Sample Variance	0.0832251	0.0564369	0	0.0434403
														Kurtosis	#DIV/0!	#DIV/0!	#DIV/0!	#DIV/0!
														Skewness	1.65464	0.840605	#DIV/0!	1.73205
														Range	0.525988	0.468367	0	0.361
														Minimum	98.8438	0.630203	0	0
														Maximum	99.3698	1.09857	0	0.361
														Sum	297.115	2.52399	0	0.361
														Count	3	3	3	3
															3.35482e-214
														Column1
														31-Gln
														Mean	99.1697	0.632092	0	0.19822
														Standard Error	0.415424	0.352712	0	0.19822
														Median	98.7807	0.676914	0	0
														Mode	#N/A	#N/A	0	0
														Standard Deviation	0.719536	0.610915	0	0.343326
														Sample Variance	0.517732	0.373217	0	0.117873
														Kurtosis	#DIV/0!	#DIV/0!	#DIV/0!	#DIV/0!
														Skewness	1.72178	-0.328385	#DIV/0!	1.73205
														Range	1.27157	1.21936	0	0.594659
														Minimum	98.7284	0	0	0
														Maximum	100	1.21936	0	0.594659
														Sum	297.509	1.89627	0	0.594659
														Count	3	3	3	3
															3.35482e-214

## Sheet: Figure 4G
																				Column1	m+0	m+1	m+2	m+3	m+4	m+5
																				37- Gluc
R5P/X5P		Corrected Abundance																		Mean	37.9102	1.53851	2.7001	3.38739	0	54.4638
																				Standard Error	4.54527	0.770311	2.7001	3.38739	0	10.4304
		229.012	230.015	231.019	232.022	233.025	234.029	Abund												Median	40.4026	2.23785	0	0	0	57.3596
File Name	Sample	m+0	m+1	m+2	m+3	m+4	m+5	Sum												Mode	#N/A	#N/A	0	0	0	#N/A
20180920-EX00881-A013-IN0016-P1-CS0000091-1-N.d	Pool	947598	10318	0	0	0	271107	1229023												Standard Deviation	7.87264	1.33422	4.67671	5.86714	0	18.0659
20180920-EX00881-A013-IN0016-P1-CS0000091-2-N.d	Pool	871983	18111	0	0	0	222125	1112219												Sample Variance	61.9785	1.78014	21.8716	34.4233	0	326.378
20180920-EX00881-A013-IN0016-P1-CS0000091-3-N.d	Pool	914668	14622	0	0	0	239739	1169028												Kurtosis	#DIV/0!	#DIV/0!	#DIV/0!	#DIV/0!	#DIV/0!	#DIV/0!
20180920-EX00881-A013-IN0016-P1-CS0000091-4-N.d	Pool	877895	16664	0	0	0	244089	1138648												Skewness	-1.28184	-1.71068	1.73205	1.73205	#DIV/0!	-0.702774
20180920-EX00881-A013-IN0016-P1-CS0000091-5-N.d	Pool	899450	20818	0	0	0	244062	1164329												Range	15.142	2.37766	8.1003	10.1622	0	35.7821
										m+0	m+1	m+2	m+3	m+4	m+5	Sum				Minimum	29.0931	0	0	0	0	35.1248
20180920-EX00881-A013-IN0016-S00035901-N.d	Glucose 37	300426	0	0	0	0	732211	1032637	37- Gluc	29.0931	0	0	0	0	70.9069	100	100			Maximum	44.235	2.37766	8.1003	10.1622	0	70.9069
20180920-EX00881-A013-IN0016-S00035902-N.d	Glucose 37	902185	49971	0	0	0	1280833	2232989	37- Gluc	40.4026	2.23785	0	0	0	57.3596	100	100			Sum	113.731	4.61552	8.1003	10.1622	0	163.391
20180920-EX00881-A013-IN0016-S00035903-N.d	Glucose 37	1198943	64444	219550	275435	0	952021	2710392	37- Gluc	44.235	2.37766	8.1003	10.1622	0	35.1248	100	100			Count	3	3	3	3	3	3
20180920-EX00881-A013-IN0016-S00035904-N.d	Glucose 31	128627	0	0	0	0	0	128627	31-Gluc	100	0	0	0	0	0	100	100				6.27415e+86
20180920-EX00881-A013-IN0016-S00035905-N.d	Glucose 31	740295	19675	126512	0	0	0	886482	31-Gluc	83.5093	2.21945	14.2712	0	0	0	100	100			31-Gluc
20180920-EX00881-A013-IN0016-S00035906-N.d	Glucose 31	1599512	0	0	0	0	276138	1875649	31-Gluc	85.2778	0	0	0	0	14.7223	100	100
20180920-EX00881-A013-IN0016-S00035907-N.d	Pyruvate 37	611020	9417	0	0	0	0	620436	37-Pyr	98.4824	1.5178	0	0	0	0	100	100			Mean	89.5957	0.739816	4.75708	0	0	4.90742
20180920-EX00881-A013-IN0016-S00035908-N.d	Pyruvate 37	1056651	8226	0	0	0	0	1064876	37-Pyr	99.2276	0.772484	0	0	0	0	100	100			Standard Error	5.22714	0.739816	4.75708	0	0	4.90742
20180920-EX00881-A013-IN0016-S00035909-N.d	Pyruvate 37	1625186	2473	0	0	0	0	1627658	37-Pyr	99.8481	0.151936	0	0	0	0	100	100			Median	85.2778	0	0	0	0	0
20180920-EX00881-A013-IN0016-S00035910-N.d	Pyruvate 31	696072	7885	0	0	0	0	703958	31-Pyr	98.8798	1.1201	0	0	0	0	100	99.9999			Mode	#N/A	0	0	0	0	0
20180920-EX00881-A013-IN0016-S00035911-N.d	Pyruvate 31	1298186	10639	35896	0	0	0	1344721	31-Pyr	96.5394	0.791168	2.6694	0	0	0	100	100			Standard Deviation	9.05367	1.2814	8.23951	0	0	8.4999
20180920-EX00881-A013-IN0016-S00035912-N.d	Pyruvate 31	1562004	13028	28835	0	0	0	1603868	31-Pyr	97.3898	0.812286	1.79784	0	0	0	100	99.9999			Sample Variance	81.969	1.64198	67.8895	0	0	72.2484
20180920-EX00881-A013-IN0016-S00035913-N.d	Glutamine 37	486918	0	0	0	0	0	486918	37-Gln	100	0	0	0	0	0	100	100			Kurtosis	#DIV/0!	#DIV/0!	#DIV/0!	#DIV/0!	#DIV/0!	#DIV/0!
20180920-EX00881-A013-IN0016-S00035914-N.d	Glutamine 37	1545711	10369	0	0	0	0	1556080	37-Gln	99.3336	0.666354	0	0	0	0	100	100			Skewness	1.658	1.73205	1.73205	#DIV/0!	#DIV/0!	1.73205
20180920-EX00881-A013-IN0016-S00035915-N.d	Glutamine 37	2081498	4840	102122	0	0	0	2188460	37-Gln	95.1125	0.22116	4.66639	0	0	0	100	100			Range	16.4907	2.21945	14.2712	0	0	14.7223
20180920-EX00881-A013-IN0016-S00035916-N.d	Glutamine 31	1590890	6964	0	0	0	0	1597854	31-Gln	99.5642	0.435835	0	0	0	0	100	100			Minimum	83.5093	0	0	0	0	0
20180920-EX00881-A013-IN0016-S00035917-N.d	Glutamine 31	1370955	13420	0	0	0	0	1384375	31-Gln	99.0306	0.969391	0	0	0	0	100	100			Maximum	100	2.21945	14.2712	0	0	14.7223
20180920-EX00881-A013-IN0016-S00035918-N.d	Glutamine 31	1521841	7066	0	0	0	0	1528906	31-Gln	99.5379	0.462161	0	0	0	0	100	100			Sum	268.787	2.21945	14.2712	0	0	14.7223
																				Count	3	3	3	3	3	3
																					6.27415e+86
																				37-Pyr
																				Mean	99.186	0.814075	0	0	0	0
																				Standard Error	0.394811	0.39484	0	0	0	0
																				Median	99.2276	0.772484	0	0	0	0
																				Mode	#N/A	#N/A	0	0	0	0
																				Standard Deviation	0.683833	0.683883	0	0	0	0
																				Sample Variance	0.467627	0.467696	0	0	0	0
																				Kurtosis	#DIV/0!	#DIV/0!	#DIV/0!	#DIV/0!	#DIV/0!	#DIV/0!
																				Skewness	-0.2726	0.272656	#DIV/0!	#DIV/0!	#DIV/0!	#DIV/0!
																				Range	1.36577	1.36587	0	0	0	0
																				Minimum	98.4824	0.151936	0	0	0	0
																				Maximum	99.8481	1.5178	0	0	0	0
																				Sum	297.558	2.44222	0	0	0	0
																				Count	3	3	3	3	3	3
																					6.27415e+86
																				31-Pyr
																				Mean	97.603	0.90785	1.48908	0	0	0
																				Standard Error	0.683953	0.106298	0.785902	0	0	0
																				Median	97.3898	0.812286	1.79784	0	0	0
																				Mode	#N/A	#N/A	#N/A	0	0	0
																				Standard Deviation	1.18464	0.184113	1.36122	0	0	0
																				Sample Variance	1.40338	0.0338976	1.85293	0	0	0
																				Kurtosis	#DIV/0!	#DIV/0!	#DIV/0!	#DIV/0!	#DIV/0!	#DIV/0!
																				Skewness	0.783604	1.70645	-0.968201	#DIV/0!	#DIV/0!	#DIV/0!
																				Range	2.34033	0.328927	2.6694	0	0	0
																				Minimum	96.5394	0.791168	0	0	0	0
																				Maximum	98.8798	1.1201	2.6694	0	0	0
																				Sum	292.809	2.72355	4.46724	0	0	0
																				Count	3	3	3	3	3	3
																					6.27415e+86
																				37-Gln
																				Mean	98.1487	0.295838	1.55546	0	0	0
																				Standard Error	1.53026	0.19595	1.55546	0	0	0
																				Median	99.3336	0.22116	0	0	0	0
																				Mode	#N/A	#N/A	0	0	0	0
																				Standard Deviation	2.65049	0.339396	2.69414	0	0	0
																				Sample Variance	7.0251	0.115189	7.25839	0	0	0
																				Kurtosis	#DIV/0!	#DIV/0!	#DIV/0!	#DIV/0!	#DIV/0!	#DIV/0!
																				Skewness	-1.6097	0.942207	1.73205	#DIV/0!	#DIV/0!	#DIV/0!
																				Range	4.88755	0.666354	4.66639	0	0	0
																				Minimum	95.1125	0	0	0	0	0
																				Maximum	100	0.666354	4.66639	0	0	0
																				Sum	294.446	0.887514	4.66639	0	0	0
																				Count	3	3	3	3	3	3
																					6.27415e+86
																				31-Gln
																				Mean	99.3776	0.622462	0	0	0	0
																				Standard Error	0.173641	0.173631	0	0	0	0
																				Median	99.5379	0.462161	0	0	0	0
																				Mode	#N/A	#N/A	0	0	0	0
																				Standard Deviation	0.300755	0.300737	0	0	0	0
																				Sample Variance	0.0904534	0.0904429	0	0	0	0
																				Kurtosis	#DIV/0!	#DIV/0!	#DIV/0!	#DIV/0!	#DIV/0!	#DIV/0!
																				Skewness	-1.71721	1.71713	#DIV/0!	#DIV/0!	#DIV/0!	#DIV/0!
																				Range	0.533556	0.533556	0	0	0	0
																				Minimum	99.0306	0.435835	0	0	0	0
																				Maximum	99.5642	0.969391	0	0	0	0
																				Sum	298.133	1.86739	0	0	0	0
																				Count	3	3	3	3	3	3
																					6.27415e+86
																				Column1	m+0	m+1	m+2	m+3	m+4	m+5
																				37- Gluc
																			37- Gluc	Mean	37.9102	1.53851	2.7001	3.38739	0	54.4638
																			31-Gluc	Mean	89.5957	0.739816	4.75708	0	0	4.90742
																			37-Pyr	Mean	99.186	0.814075	0	0	0	0
																			31-Pyr	Mean	97.603	0.90785	1.48908	0	0	0
																			37-Gln	Mean	98.1487	0.295838	1.55546	0	0	0
																			31-Gln	Mean	99.3776	0.622462	0	0	0	0
																			37- Gluc	Standard Deviation	7.87264	1.33422	4.67671	5.86714	0	18.0659
																			31-Gluc	Standard Deviation	9.05367	1.2814	8.23951	0	0	8.4999
																			37-Pyr	Standard Deviation	0.683833	0.683883	0	0	0	0
																			31-Pyr	Standard Deviation	1.18464	0.184113	1.36122	0	0	0
																			37-Gln	Standard Deviation	2.65049	0.339396	2.69414	0	0	0
																			31-Gln	Standard Deviation	0.300755	0.300737	0	0	0	0

## Sheet: Figure 4H, 4I
										TTESTglucose	m+0	0.00128017	TTEST-pyr	m+0	8.94677e-05	TTEST-glu	m+0	0.69174
Figure 4H											m+1	0.287375		m+1	0.00209106		m+1	0.689315		m+0	m+1	m+2	m+3	m+4	m+5	m+6			m+0	m+1	m+2	m+3	m+4
Citrate/isocitrate		Corrected Abundance									m+2	0.0152453		m+2	0.00160273		m+2	0.00271872	Column1									Column1
											m+3	0.0015881		m+3	0.599816		m+3	0.254909
		191.02	192.023	193.026	194.03	195.033	196.036	197.04	Abund		m+4	0.0115471		m+4	0.451499		m+4	0.101676	Mean	46.6688	2.90706	16.2776	31.9051	1.0561	1.18539	0		Mean	48.8984	3.70577	16.6736	30.0084	0.713882	100
File Name	Sample	m+0	m+1	m+2	m+3	m+4	m+5	m+6	Sum		m+5	0.00102815		m+5	0.42265		m+5	0.0415295	Standard Error	2.40368	0.119733	0.928307	1.66545	0.0559961	0.024389	0		Standard Error	3.55513	0.186289	1.12483	4.83698	0.012261	4.73011e-06
20180920-EX00881-A013-IN0016-P1-CS0000091-1-N.d	Pool	13452770	537171	1662844	1232155	229042	212121	0	17326107		m+6	0.42265		m+6	#DIV/0!		m+6	0.609677	Median	45.7127	3.00189	16.9715	32.1003	1.057	1.20324	0		Median	51.1529	3.71004	16.8203	27.6227	0.711312	100
20180920-EX00881-A013-IN0016-P1-CS0000091-2-N.d	Pool	12212870	524099	1649680	1156337	188534	210562	0	15942076										Mode	#N/A	#N/A	#N/A	#N/A	#N/A	#N/A	0		Mode	#N/A	#N/A	#N/A	#N/A	#N/A	#N/A
20180920-EX00881-A013-IN0016-P1-CS0000091-3-N.d	Pool	12841230	587965	1738157	1218282	198753	213319	0	16797706										Standard Deviation	4.1633	0.207383	1.60788	2.88465	0.0969881	0.042243	0		Standard Deviation	6.15766	0.322663	1.94826	8.3779	0.0212366	8.19279e-06
20180920-EX00881-A013-IN0016-P1-CS0000091-4-N.d	Pool	13313200	561177	1850634	1265855	193883	231980	0	17416729										Sample Variance	17.333	0.0430077	2.58526	8.32119	0.00940669	0.00178447	0		Sample Variance	37.9168	0.104111	3.79571	70.1892	0.000450993	6.71218e-11
20180920-EX00881-A013-IN0016-P1-CS0000091-5-N.d	Pool	13699970	592158	1838276	1299540	225139	234067	0	17889154										Kurtosis	#DIV/0!	#DIV/0!	#DIV/0!	#DIV/0!	#DIV/0!	#DIV/0!	#DIV/0!		Kurtosis	#DIV/0!	#DIV/0!	#DIV/0!	#DIV/0!	#DIV/0!	#DIV/0!
											m+0	m+1	m+2	m+3	m+4	m+5	m+6	Sum	Skewness	0.978902	-1.62746	-1.58029	-0.303031	-0.0418011	-1.56238	#DIV/0!		Skewness	-1.42672	-0.0595713	-0.336932	1.17749	0.536617	-0.520285
20180920-EX00881-A013-IN0016-S00035901-N.d	Glucose 37	5143876	358545	2027069	4143037	126248	145211	0	11943985		43.0667	3.00189	16.9715	34.6872	1.057	1.21577	0	100	Range	8.16026	0.380857	2.98274	5.75938	0.19397	0.0786202	0		Range	11.6798	0.645283	3.88822	16.2383	0.0422393	1.63009e-05
20180920-EX00881-A013-IN0016-S00035902-N.d	Glucose 37	2906180	169695	1107605	2040771	60947	72294	0	6357492		45.7127	2.66921	17.422	32.1003	0.958664	1.13715	0	100	Minimum	43.0667	2.66921	14.4393	28.9278	0.958664	1.13715	0		Minimum	41.9312	3.38099	14.6562	23.082	0.694047	100
20180920-EX00881-A013-IN0016-S00035903-N.d	Glucose 37	2306788	137347	650213	1302643	51904	54183	0	4503077		51.2269	3.05007	14.4393	28.9278	1.15263	1.20324	0	100	Maximum	51.2269	3.05007	17.422	34.6872	1.15263	1.21577	0		Maximum	53.611	4.02628	18.5444	39.3203	0.736286	100
20180920-EX00881-A013-IN0016-S00035904-N.d	Glucose 31	15426440	847719	2237290	2295692	94407	63267	0	20964818		73.5825	4.04353	10.6716	10.9502	0.450312	0.301777	0	100	Sum	140.006	8.72117	48.8328	95.7153	3.1683	3.55616	0		Sum	146.695	11.1173	50.0209	90.0251	2.14165	300
20180920-EX00881-A013-IN0016-S00035905-N.d	Glucose 31	23861460	1005710	2796223	2986937	112989	98529	0	30861847		77.317	3.25875	9.06045	9.67841	0.366112	0.319258	0	100	Count	3	3	3	3	3	3	3		Count	3	3	3	3	3	3
20180920-EX00881-A013-IN0016-S00035906-N.d	Glucose 31	42491570	1559492	4770920	4431087	179566	182461	35092	53650189		79.2012	2.90678	8.89264	8.25922	0.334698	0.340094	0.0654089	100		1.38549e+19
20180920-EX00881-A013-IN0016-S00035907-N.d	Pyruvate 37	15402060	204508	1093534	94118	0	0	0	16794224		91.7105	1.21773	6.51137	0.560419	0	0	0	100	Column1									Column1
20180920-EX00881-A013-IN0016-S00035908-N.d	Pyruvate 37	17217510	261302	1211412	18021	30733	0	0	18738980		91.8807	1.39443	6.46466	0.0961685	0.164006	0	0	100
20180920-EX00881-A013-IN0016-S00035909-N.d	Pyruvate 37	11504100	161376	736682	47932	9756	0	0	12459844		92.3294	1.29517	5.91245	0.384692	0.0782995	0	0	100	Mean	76.7002	3.40302	9.54158	9.62928	0.383707	0.320376	0.021803		Mean	79.4791	3.50429	8.06833	8.61967	0.328654	100
20180920-EX00881-A013-IN0016-S00035910-N.d	Pyruvate 31	29843060	1654316	6132870	144927	49280	0	0	37824455		78.8988	4.37367	16.214	0.383157	0.130286	0	0	100	Standard Error	1.65102	0.335987	0.567104	0.777211	0.0345148	0.0110752	0.021803		Standard Error	2.85953	0.279474	0.539636	2.00155	0.044943	7.02652e-06
20180920-EX00881-A013-IN0016-S00035911-N.d	Pyruvate 31	16777850	1000300	3250281	88614	23134	0	0	21140177		79.3648	4.73175	15.3749	0.419173	0.109431	0	0	100	Median	77.317	3.25875	9.06045	9.67841	0.366112	0.319258	0		Median	80.5173	3.31202	7.88346	7.99622	0.290973	100
20180920-EX00881-A013-IN0016-S00035912-N.d	Pyruvate 31	13982230	871453	2515652	88940	27213	11016	0	17496501		79.9144	4.98073	14.378	0.50833	0.155534	0.0629612	0	100	Mode	#N/A	#N/A	#N/A	#N/A	#N/A	#N/A	0		Mode	#N/A	#N/A	#N/A	#N/A	#N/A	#N/A
20180920-EX00881-A013-IN0016-S00035913-N.d	Glutamine 37	15332450	238813	262690	425514	591866	1167596	35197	18054121		84.9249	1.32276	1.45501	2.35688	3.27829	6.4672	0.194953	100	Standard Deviation	2.85965	0.581947	0.982252	1.34617	0.0597815	0.0191829	0.0377638		Standard Deviation	4.95286	0.484064	0.934677	3.46679	0.0778435	1.21703e-05
20180920-EX00881-A013-IN0016-S00035914-N.d	Glutamine 37	14363400	197430	224900	356273	543678	951535	0	16637218		86.3329	1.18668	1.35179	2.14142	3.26784	5.71932	0	100	Sample Variance	8.17761	0.338663	0.964819	1.81217	0.00357382	0.000367983	0.00142611		Sample Variance	24.5308	0.234318	0.873621	12.0187	0.00605961	1.48116e-10
20180920-EX00881-A013-IN0016-S00035915-N.d	Glutamine 37	18767170	151600	391780	379354	676047	1014909	24809	21405667		87.6738	0.708224	1.83026	1.77221	3.15826	4.74131	0.115899	100	Kurtosis	#DIV/0!	#DIV/0!	#DIV/0!	#DIV/0!	#DIV/0!	#DIV/0!	#DIV/0!		Kurtosis	#DIV/0!	#DIV/0!	#DIV/0!	#DIV/0!	#DIV/0!	#DIV/0!
20180920-EX00881-A013-IN0016-S00035916-N.d	Glutamine 31	52138180	651594	1605944	1448133	2116888	1944259	43345	59948347		86.9718	1.08693	2.67888	2.41563	3.53119	3.24322	0.0723039	100	Skewness	-0.925438	1.04703	1.67535	-0.164019	1.20972	0.261399	1.73205		Skewness	-0.901867	1.50536	0.855239	0.783085	1.66788	-0.851081
20180920-EX00881-A013-IN0016-S00035917-N.d	Glutamine 31	48065990	688057	1404128	1290695	1992438	1658219	46302	55145827		87.1616	1.2477	2.54621	2.34051	3.61303	3.00697	0.0839628	100	Range	5.61864	1.13675	1.779	2.69099	0.115614	0.0383169	0.0654089		Range	9.74112	0.909053	1.84173	6.84898	0.141346	2.39847e-05
20180920-EX00881-A013-IN0016-S00035918-N.d	Glutamine 31	50457480	678062	1674468	1484685	2294909	1912586	24886	58527080		86.2122	1.15854	2.86101	2.53675	3.92111	3.26787	0.0425205	100	Minimum	73.5825	2.90678	8.89264	8.25922	0.334698	0.301777	0		Minimum	74.0894	3.14589	7.2399	5.5069	0.276822	100
																			Maximum	79.2012	4.04353	10.6716	10.9502	0.450312	0.340094	0.0654089		Maximum	83.8305	4.05494	9.08163	12.3559	0.418168	100
																			Sum	230.101	10.2091	28.6247	28.8878	1.15112	0.961129	0.0654089		Sum	238.437	10.5129	24.205	25.859	0.985963	300
																			Count	3	3	3	3	3	3	3		Count	3	3	3	3	3	3
																				1.38549e+19
											m+0	m+1	m+2	m+3	m+4	m+5	m+6		Column1									Column1
											46.6688	2.90706	16.2776	31.9051	1.0561	1.18539	0	100
											76.7002	3.40302	9.54158	9.62928	0.383707	0.320376	0.021803	100	Mean	91.9735	1.30244	6.29616	0.347093	0.0807684	0	0		Mean	94.7423	0.576079	4.58991	0.0917208	0	100
											91.9735	1.30244	6.29616	0.347093	0.0807684	0	0	100	Standard Error	0.184602	0.051139	0.192329	0.13533	0.0473605	0	0		Standard Error	0.178908	0.0559791	0.170694	0.0431053	0	1.0585e-06
											79.3927	4.69538	15.3223	0.436887	0.13175	0.0209871	0	100	Median	91.8807	1.29517	6.46466	0.384692	0.0782995	0	0		Median	94.9047	0.539766	4.54106	0.0876733	0	100
											86.3106	1.07255	1.54569	2.09017	3.2348	5.64261	0.103617	100	Mode	#N/A	#N/A	#N/A	#N/A	#N/A	0	0		Mode	#N/A	#N/A	#N/A	#N/A	0	#N/A
											86.7819	1.16439	2.69537	2.43097	3.68844	3.17269	0.0662624	100	Standard Deviation	0.31974	0.0885753	0.333123	0.234398	0.0820307	0	0		Standard Deviation	0.309878	0.0969586	0.295651	0.0746606	0	1.83337e-06
																			Sample Variance	0.102234	0.00784558	0.110971	0.0549423	0.00672904	0	0		Sample Variance	0.0960245	0.00940098	0.0874096	0.00557421	0	3.36126e-12
											4.1633	0.207383	1.60788	2.88465	0.0969881	0.042243	0		Kurtosis	#DIV/0!	#DIV/0!	#DIV/0!	#DIV/0!	#DIV/0!	#DIV/0!	#DIV/0!		Kurtosis	#DIV/0!	#DIV/0!	#DIV/0!	#DIV/0!	#DIV/0!	#DIV/0!
											2.85965	0.581947	0.982252	1.34617	0.0597815	0.0191829	0.0377638		Skewness	1.19612	0.367041	-1.69382	-0.703253	0.135314	#DIV/0!	#DIV/0!		Skewness	-1.7105	1.44896	0.723241	0.24324	#DIV/0!	0.0786541
											0.31974	0.0885753	0.333123	0.234398	0.0820307	0	0		Range	0.618947	0.176702	0.59892	0.46425	0.164006	0	0		Range	0.552285	0.183434	0.585217	0.149157	0	3.66633e-06
											0.508368	0.305159	0.919131	0.0644392	0.0230861	0.0363506	0		Minimum	91.7105	1.21773	5.91245	0.0961685	0	0	0		Minimum	94.385	0.502519	4.32172	0.0191663	0	100
											1.37459	0.322773	0.251795	0.295684	0.066487	0.865498	0.098055		Maximum	92.3294	1.39443	6.51137	0.560419	0.164006	0	0		Maximum	94.9373	0.685953	4.90694	0.168323	0	100
											0.502404	0.0805488	0.158049	0.0990123	0.205607	0.144042	0.0213715		Sum	275.921	3.90733	18.8885	1.04128	0.242305	0	0		Sum	284.227	1.72824	13.7697	0.275162	0	300
																			Count	3	3	3	3	3	3	3		Count		3	3	3	3	3
																				1.38549e+19
																			Column1									Column1
																			Mean	79.3927	4.69538	15.3223	0.436887	0.13175	0.0209871	0		Mean	85.6637	4.15012	10.04	0.126228	0.019963	100
																			Standard Error	0.293507	0.176184	0.530661	0.037204	0.0133288	0.0209871	0		Standard Error	0.919964	0.188443	0.850616	0.00869183	0.019963	9.60944e-06
																			Median	79.3648	4.73175	15.3749	0.419173	0.130286	0	0		Median	85.2242	4.02402	10.0668	0.128338	0	100
																			Mode	#N/A	#N/A	#N/A	#N/A	#N/A	0	0		Mode	#N/A	#N/A	#N/A	#N/A	0	#N/A
																			Standard Deviation	0.508368	0.305159	0.919131	0.0644392	0.0230861	0.0363506	0		Standard Deviation	1.59342	0.326392	1.47331	0.0150547	0.034577	1.6644e-05
																			Sample Variance	0.258438	0.0931222	0.844802	0.00415241	0.000532969	0.00132137	0		Sample Variance	2.539	0.106532	2.17064	0.000226644	0.00119557	2.77024e-10
																			Kurtosis	#DIV/0!	#DIV/0!	#DIV/0!	#DIV/0!	#DIV/0!	#DIV/0!	#DIV/0!		Kurtosis	#DIV/0!	#DIV/0!	#DIV/0!	#DIV/0!	#DIV/0!	#DIV/0!
											m+0	m+1	m+2	m+3	m+4				Skewness	0.246435	-0.52867	-0.256579	1.14352	0.284298	1.73205	#DIV/0!		Skewness	1.1468	1.47908	-0.0820118	-0.618363	1.73205	-1.53336
										Mean	48.8984	3.70577	16.6736	30.0084	0.713882		100		Range	1.01559	0.60706	1.836	0.125173	0.0461025	0.0629612	0		Range	3.09459	0.615159	2.94625	0.0298867	0.0598891	3.11264e-05
											79.4791	3.50429	8.06833	8.61967	0.328654		100		Minimum	78.8988	4.37367	14.378	0.383157	0.109431	0	0		Minimum	84.3362	3.90559	8.55341	0.11023	0	100
											94.7423	0.576079	4.58991	0.0917208	0		100		Maximum	79.9144	4.98073	16.214	0.50833	0.155534	0.0629612	0		Maximum	87.4308	4.52075	11.4997	0.140116	0.0598891	100
											85.6637	4.15012	10.04	0.126228	0.019963		100		Sum	238.178	14.0861	45.967	1.31066	0.395251	0.0629612	0		Sum	256.991	12.4504	30.1199	0.378684	0.0598891	300
											91.1772	0.519086	1.46129	1.0677	5.77474		100		Count	3	3	3	3	3	3	3		Count	3	3	3	3	3	3
											86.8184	1.41573	3.01222	1.76788	6.98573		100			1.38549e+19
																			Column1									Column1
										Standard Deviation	6.15766	0.322663	1.94826	8.3779	0.0212366
											4.95286	0.484064	0.934677	3.46679	0.0778435				Mean	86.3106	1.07255	1.54569	2.09017	3.2348	5.64261	0.103617		Mean	91.1772	0.519086	1.46129	1.0677	5.77474	100
											0.309878	0.0969586	0.295651	0.0746606	0				Standard Error	0.79362	0.186353	0.145374	0.170713	0.0383863	0.499695	0.0566121		Standard Error	0.212672	0.0263619	0.0683235	0.139124	0.236872	7.12124e-06
											1.59342	0.326392	1.47331	0.0150547	0.034577				Median	86.3329	1.18668	1.45501	2.14142	3.26784	5.71932	0.115899		Median	91.262	0.497792	1.4473	1.07295	5.59279	100
Figure 4I											0.368358	0.0456601	0.11834	0.240971	0.410275				Mode	#N/A	#N/A	#N/A	#N/A	#N/A	#N/A	#N/A		Mode	#N/A	#N/A	#N/A	#N/A	#N/A	#N/A
											0.954124	0.160798	0.410954	0.446181	0.81095				Standard Deviation	1.37459	0.322773	0.251795	0.295684	0.066487	0.865498	0.098055		Standard Deviation	0.368358	0.0456601	0.11834	0.240971	0.410275	1.23344e-05
Malate		Corrected Abundance																	Sample Variance	1.8895	0.104182	0.0634009	0.0874289	0.00442052	0.749087	0.00961477		Sample Variance	0.135688	0.00208484	0.0140043	0.0580668	0.168326	1.52136e-10
																			Kurtosis	#DIV/0!	#DIV/0!	#DIV/0!	#DIV/0!	#DIV/0!	#DIV/0!	#DIV/0!		Kurtosis	#DIV/0!	#DIV/0!	#DIV/0!	#DIV/0!	#DIV/0!	#DIV/0!
		133.014	134.018	135.021	136.024	137.028	Abund	TTESTglucose	m+0	0.000729578	TTEST-pyr	m+0	0.00783168	TTEST-glu	m+0	0.00837372			Skewness	-0.0732197	-1.39216	1.41036	-0.756541	-1.68408	-0.395693	-0.554806		Skewness	-0.981124	1.64218	0.524547	-0.0980989	1.60318	1.68786
File Name	Sample	m+0	m+1	m+2	m+3	m+4	Sum		m+1	0.703753		m+1	0.00429057		m+1	0.0055824			Range	2.74891	0.614538	0.478474	0.584667	0.120026	1.72589	0.194953		Range	0.721924	0.083541	0.235436	0.481855	0.757616	2.22327e-05
20180920-EX00881-A013-IN0016-P1-CS0000091-1-N.d	Pool	18972930	563683	1823630	1665111	393768	23419123		m+2	0.0353519		m+2	0.0153279		m+2	0.0152007			Minimum	84.9249	0.708224	1.35179	1.77221	3.15826	4.74131	0		Minimum	90.7738	0.487962	1.35057	0.824144	5.48691	100
20180920-EX00881-A013-IN0016-P1-CS0000091-2-N.d	Pool	17678150	530572	1771648	1551597	363414	21895377		m+3	0.0172967		m+3	0.480234		m+3	0.0356655	#DIV/0!		Maximum	87.6738	1.32276	1.83026	2.35688	3.27829	6.4672	0.194953		Maximum	91.4957	0.571503	1.586	1.306	6.24453	100
20180920-EX00881-A013-IN0016-P1-CS0000091-3-N.d	Pool	19975390	578754	1868343	1761635	383848	24567969		m+4	0.0156931		m+4	0.42265		m+4	0.082221	#DIV/0!		Sum	258.932	3.21766	4.63707	6.27051	9.70439	16.9278	0.310852		Sum	273.532	1.55726	4.38387	3.2031	17.3242	300
20180920-EX00881-A013-IN0016-P1-CS0000091-4-N.d	Pool	18946010	535075	1808272	1661743	384508	23335609												Count	3	3	3	3	3	3	3		Count	3	3	3	3	3	3
20180920-EX00881-A013-IN0016-P1-CS0000091-5-N.d	Pool	19227510	543926	1800074	1688692	372578	23632780													1.38549e+19
									m+0	m+1	m+2	m+3	m+4	Sum					Column1									Column1
20180920-EX00881-A013-IN0016-S00035901-N.d	Glucose 37	12556280	1012437	4388781	11774460	213002	29944960		41.9312	3.38099	14.6562	39.3203	0.711312	100
20180920-EX00881-A013-IN0016-S00035902-N.d	Glucose 37	10666710	773641	3507479	5760059	144727	20852618		51.1529	3.71004	16.8203	27.6227	0.694047	100					Mean	86.7819	1.16439	2.69537	2.43097	3.68844	3.17269	0.0662624		Mean	86.8184	1.41573	3.01222	1.76788	6.98573	100
20180920-EX00881-A013-IN0016-S00035903-N.d	Glucose 37	7989962	600059	2763776	3440046	109733	14903575		53.611	4.02628	18.5444	23.082	0.736286	100					Standard Error	0.290063	0.0465049	0.0912496	0.0571648	0.118707	0.0831626	0.0123389		Standard Error	0.550863	0.0928367	0.237265	0.257603	0.468202	2.3103e-06
20180920-EX00881-A013-IN0016-S00035904-N.d	Glucose 31	12590840	689102	1543343	2099775	71064	16994124		74.0894	4.05494	9.08163	12.3559	0.418168	100					Median	86.9718	1.15854	2.67888	2.41563	3.61303	3.24322	0.0723039		Median	87.0415	1.33969	2.9241	1.59873	7.096	100
20180920-EX00881-A013-IN0016-S00035905-N.d	Glucose 31	20666660	850109	2023475	2052418	74685	25667351		80.5173	3.31202	7.88346	7.99622	0.290973	100					Mode	#N/A	#N/A	#N/A	#N/A	#N/A	#N/A	#N/A		Mode	#N/A	#N/A	#N/A	#N/A	#N/A	#N/A
20180920-EX00881-A013-IN0016-S00035906-N.d	Glucose 31	29937060	1123442	2585472	1966594	98857	35711422		83.8305	3.14589	7.2399	5.5069	0.276822	100					Standard Deviation	0.502404	0.0805488	0.158049	0.0990123	0.205607	0.144042	0.0213715		Standard Deviation	0.954124	0.160798	0.410954	0.446181	0.81095	4.00156e-06
20180920-EX00881-A013-IN0016-S00035907-N.d	Pyruvate 37	28103610	160718	1461067	50119	0	29775511		94.385	0.539766	4.90694	0.168323	0	100					Sample Variance	0.25241	0.0064881	0.0249795	0.00980344	0.0422741	0.020748	0.000456742		Sample Variance	0.910352	0.025856	0.168884	0.199078	0.65764	1.60125e-11
20180920-EX00881-A013-IN0016-S00035908-N.d	Pyruvate 37	29625930	156815	1417073	5981	0	31205797		94.9373	0.502519	4.54106	0.0191663	0	100					Kurtosis	#DIV/0!	#DIV/0!	#DIV/0!	#DIV/0!	#DIV/0!	#DIV/0!	#DIV/0!		Kurtosis	#DIV/0!	#DIV/0!	#DIV/0!	#DIV/0!	#DIV/0!	#DIV/0!
20180920-EX00881-A013-IN0016-S00035909-N.d	Pyruvate 37	23164010	167425	1054832	21399	0	24407664		94.9047	0.685953	4.32172	0.0876733	0	100					Skewness	-1.45821	0.324954	0.46434	0.68006	1.42841	-1.6752	-1.17044		Skewness	-0.994484	1.65214	0.920566	1.46082	-0.600576	1.00205
20180920-EX00881-A013-IN0016-S00035910-N.d	Pyruvate 31	17546010	837190	2392487	29151	0	20804842		84.3362	4.02402	11.4997	0.140116	0	100					Range	0.949414	0.160779	0.314805	0.196236	0.38992	0.260894	0.0414423		Range	1.86873	0.293389	0.807613	0.842894	1.61062	7.8345e-06
20180920-EX00881-A013-IN0016-S00035911-N.d	Pyruvate 31	21484960	1139678	2537840	32354	15098	25209927		85.2242	4.52075	10.0668	0.128338	0.0598891	100					Minimum	86.2122	1.08693	2.54621	2.34051	3.53119	3.00697	0.0425205		Minimum	85.7726	1.30705	2.65247	1.43101	6.12529	100
20180920-EX00881-A013-IN0016-S00035912-N.d	Pyruvate 31	26671100	1191416	2609252	33626	0	30505392		87.4308	3.90559	8.55341	0.11023	0	100					Maximum	87.1616	1.2477	2.86101	2.53675	3.92111	3.26787	0.0839628		Maximum	87.6413	1.60044	3.46009	2.27391	7.7359	100
20180920-EX00881-A013-IN0016-S00035913-N.d	Glutamine 37	27713060	151162	439494	396586	1666182	30366488		91.262	0.497792	1.4473	1.306	5.48691	100					Sum	260.346	3.49317	8.0861	7.2929	11.0653	9.51806	0.198787		Sum	260.455	4.24718	9.03666	5.30365	20.9572	300
20180920-EX00881-A013-IN0016-S00035914-N.d	Glutamine 37	30295490	161571	447191	355270	1851849	33111368		91.4957	0.487962	1.35057	1.07295	5.59279	100					Count	3	3	3	3	3	3	3		Count	3	3	3	3	3	3
20180920-EX00881-A013-IN0016-S00035915-N.d	Glutamine 37	32095940	202073	560781	291402	2207949	35358149		90.7738	0.571503	1.586	0.824144	6.24453	100						1.38549e+19
20180920-EX00881-A013-IN0016-S00035916-N.d	Glutamine 31	22016970	328354	666346	571244	1538775	25121686		87.6413	1.30705	2.65247	2.27391	6.12529	100
20180920-EX00881-A013-IN0016-S00035917-N.d	Glutamine 31	26338870	405391	884836	483777	2147258	30260130		87.0415	1.33969	2.9241	1.59873	7.096	100
20180920-EX00881-A013-IN0016-S00035918-N.d	Glutamine 31	20882570	389651	842408	348401	1883417	24346446		85.7726	1.60044	3.46009	1.43101	7.7359	100

## Sheet: SuppFigure S4A
Fig 5B																				Fig 5A				#181 18w22	beta oxidation
		#200-18W28	beta oxidation																						Day16	Assay 3hrs				ng/µL	µg
			Day6-14	Assay 3hrs	12 days keep				ng/uL	x 500uL /1000 ; ug														#181-201	37oC	0		8471	5007	100.32	60.192	83.1838
		#200-101	37oC	37oC		oleic acid	15039	1765.33	73.33	36.665	48.1476													#181-202	37oC	0		9044	5580	135.34	81.204	68.7158
		#200-102	37oC	37oC		oleic acid	15919	2645.33	77.52	38.76	68.2491													#181-203	37oC	0		7016	3552	100.23	60.138	59.0642
		#200-103	37oC	37oC		oleic acid	15592	2318.33	75.21	37.605	61.6496													#181-204	37oC	0		8910	5446	104.2	62.52	87.1081
		#200-104	37oC	37oC		oleic acid	15281	2007.33	76.82	38.41	52.2607													#181-205	37oC	0		9015	5551	104.38	62.628	88.6345
		#200-105	37oC	37oC		oleic acid	16296	3022.33	75.52	37.76	80.0406													#181-206	37oC	0	Etmoxior pre3hrs+ duing 3hrs	4717	1253	112.55	67.53	18.5547
		#200-106	37oC	37oC		oleic acid	13872	598.333	75.56	37.78	15.8373													#181-207	37oC	0	Etmoxior	4149	685	109.47	65.682	10.429
		#200-107	37oC	37oC	Etmoxior	oleic acid	13950	676.333	79.08	39.54	17.105													#181-208	37oC	0	Etmoxior	4047	583	97.1	58.26	10.0069
		#200-108	37oC	37oC	Etmoxior	oleic acid	13644	370.333	78.91	39.455	9.38622													#181-209	37oC	0	Etmoxior	3459	-5	103.02	61.812	-0.0808904
		#200-109	37oC	37oC	Etmoxior	oleic acid	14343	1069.33	78.92	39.46	27.0992													#181-210	37oC	0	Etmoxior	3632	168	102.71	61.626	2.72612
		#200-110	37oC	37oC	Etmoxior	oleic acid	13544	270.333	79.42	39.71	6.80769													#181-211	31oC	1 day		7613	4149	101.84	61.104	67.9006
		#200-111	37oC	37oC	Etmoxior	oleic acid	14547	1273.33	95.14	47.57	26.7676													#181-212	31oC	1 day		6552	3088	112.63	67.578	45.6953
		#200-112	37oC	37oC	Etmoxior	oleic acid	15379	2105.33	87.48	43.74	48.1329													#181-213	31oC	1 day		6853	3389	104.23	62.538	54.1911
		#200-113	31oC	31oC		oleic acid	19946	6672.33	90.28	45.14	147.814													#181-214	31oC	1 day		7310	3846	110.37	66.222	58.0774
		#200-114	31oC	31oC		oleic acid	19217	5943.33	91.96	45.98	129.259													#181-215	31oC	1 day		7156	3692	104.98	62.988	58.6143
		#200-115	31oC	31oC		oleic acid	20772	7498.33	89.64	44.82	167.299													#181-216	31oC	1 day	Etmoxior	4591	1127	107.19	64.314	17.5234
		#200-116	31oC	31oC		oleic acid	20266	6992.33	93.12	46.56	150.179													#181-217	31oC	1 day	Etmoxior	3255	-209	109.48	65.688	-3.18171
		#200-117	31oC	31oC		oleic acid	20942	7668.33	94.99	47.495	161.456													#181-218	31oC	1 day	Etmoxior	3436	-28	105.38	63.228	-0.442842
		#200-118	31oC	31oC		oleic acid	18276	5002.33	104.5	52.25	95.7384													#181-219	31oC	1 day	Etmoxior	3822	358	116.91	70.146	5.10364
		#200-119	31oC	31oC	Etmoxior	oleic acid	13507	233.333	100.71	50.355	4.63377													#181-220	31oC	1 day	Etmoxior	3614	150	114.67	68.802	2.18017
		#200-120	31oC	31oC	Etmoxior	oleic acid	15454	2180.33	89.55	44.775	48.6953													#181-221	31oC	4 days		8444	4980	111.41	66.846	74.4996
		#200-121	31oC	31oC	Etmoxior	oleic acid	13846	572.333	95.4	47.7	11.9986													#181-222	31oC	4 days		8628	5164	107.02	64.212	80.4211
		#200-122	31oC	31oC	Etmoxior	oleic acid	13727	453.333	99.15	49.575	9.14439													#181-223	31oC	4 days		9068	5604	109.29	65.574	85.4607
		#200-123	31oC	31oC	Etmoxior	oleic acid	15550	2276.33	100.5	50.25	45.3002													#181-224	31oC	4 days		9292	5828	112.31	67.386	86.4868
		#200-124	31oC	31oC	Etmoxior	oleic acid	16349	3075.33	101.27	50.635	60.7353													#181-225	31oC	4 days		8579	5115	109.65	65.79	77.7474
																								#181-226	31oC	4 days	Etmoxior	4659	1195	109.97	65.982	18.111
						13273.7	13327																	#181-227	31oC	4 days	Etmoxior	5064	1600	111.36	66.816	23.9464
							13217																	#181-228	31oC	4 days	Etmoxior	4746	1282	105.42	63.252	20.2681
							13277																	#181-229	31oC	4 days	Etmoxior	4262	798	111.53	66.918	11.925
																								#181-230	31oC	4 days	Etmoxior	4036	572	114.72	68.832	8.31009
						359	345																	#181-231	31oC	6days		14602	11138	118.58	71.148	156.547
							361		0.38															#181-232	31oC	6days		12305	8841	105.34	63.204	139.88
							371																	#181-233	31oC	6days		9984	6520	100.79	60.474	107.815
																								#181-234	31oC	6days		11725	8261	115.96	69.576	118.733
				18;1						48.1476	17.105	147.814	4.63377											#181-235	31oC	6days		11507	8043	116.42	69.852	115.143
					37oC	37oC ET	31oC	31oC ET		68.2491	9.38622	129.259	48.6953											#181-236	31oC	6days	Etmoxior	6027	2563	112.26	67.356	38.0515
				Mean	56.1859	20.7281	141.958	30.0846		61.6496	27.0992	167.299	11.9986											#181-237	31oC	6days	Etmoxior	4551	1087	115.52	69.312	15.6827
				Standard Error	7.50528	6.19429	10.6797	9.88379		52.2607	6.80769	150.179	9.14439											#181-238	31oC	6days	Etmoxior	4685	1221	122.01	73.206	16.679
				Median	56.9551	16.4712	148.997	28.6494		80.0406	26.7676	161.456	45.3002											#181-239	31oC	6days	Etmoxior	5506	2042	124.55	74.73	27.325
				Mode	#N/A	#N/A	#N/A	#N/A		15.8373	48.1329	95.7384	60.7353											#181-240	31oC	6days	Etmoxior	5086	1622	125.67	75.402	21.5114
				Standard Deviation	18.3841	15.1728	26.1599	24.2102																#181-241	31oC	8 days		13681	10217	114.49	68.694	148.732
				Sample Variance	337.976	230.215	684.341	586.136		37 vs. 37 Et	31.81	-4.191 to 67.82	No	ns	0.0953	A-B								#181-242	31oC	8 days		17576	14112	121.23	72.738	194.011
				Kurtosis	0.486496	1.94581	1.45075	-2.63339		37 vs. 31	-87.59	-123.6 to -51.59	Yes	****	<0.0001	A-C								#181-243	31oC	8 days		14466	11002	125.51	75.306	146.097
				Skewness	-0.509212	1.41878	-1.27924	0.151796		37 vs. 31 Et	24.28	-11.73 to 60.28	No	ns	0.2647	A-D								#181-244	31oC	8 days		15768	12304	116.83	70.098	175.526
				Range	53.273	41.3252	71.5604	56.1016		37 Et vs. 31	-119.4	-155.4 to -83.4	Yes	****	<0.0001	B-C								#181-245	31oC	8 days		16345	12881	119.71	71.826	179.336
				Minimum	26.7676	6.80769	95.7384	4.63377		37 Et vs. 31 Et	-7.535	-43.54 to 28.47	No	ns	0.9352	B-D								#181-246	31oC	8 days	Etmoxior	5367	1903	118.48	71.088	26.7696
				Maximum	80.0406	48.1329	167.299	60.7353		31 vs. 31 Et	111.9	75.87 to 147.9	Yes	****	<0.0001	C-D								#181-247	31oC	8 days	Etmoxior	5100	1636	115.74	69.444	23.5586
				Sum	337.115	124.368	851.745	180.508																#181-248	31oC	8 days	Etmoxior	5178	1714	113.12	67.872	25.2534
				Count	6	6	6	6																#181-249	31oC	8 days	Etmoxior	4614	1150	126.87	76.122	15.1073
										Test details	Mean 1	Mean 2	Mean Diff.	SE of diff.	n1	n2	q							#181-250	31oC	8 days	Etmoxior	4793	1329	125.13	75.078	17.7016
																								#181-251	31oC	12 days		19121	15657	121.64	72.984	214.526
										37 vs. 37 Et	54.36	22.55	31.81	12.86	6	6	3.498							#181-252	31oC	12 days		18205	14741	124.17	74.502	197.86
										37 vs. 31	54.36	142	-87.59	12.86	6	6	9.63							#181-253	31oC	12 days		18851	15387	118.35	71.01	216.688
										37 vs. 31 Et	54.36	30.08	24.28	12.86	6	6	2.669							#181-254	31oC	12 days		17928	14464	129.56	77.736	186.066
										37 Et vs. 31	22.55	142	-119.4	12.86	6	6	13.13							#181-255	31oC	12 days		18025	14561	127.86	76.716	189.804
										37 Et vs. 31 Et	22.55	30.08	-7.535	12.86	6	6	0.8284							#181-256	31oC	12 days	Etmoxior	6983	3519	128.87	77.322	45.511
					1.00798e-61					31 vs. 31 Et	142	30.08	111.9	12.86	6	6	12.3							#181-257	31oC	12 days	Etmoxior	5914	2450	117.61	70.566	34.7193
																								#181-258	31oC	12 days	Etmoxior	5763	2299	129.54	77.724	29.579
																								#181-259	31oC	12 days	Etmoxior	6769	3305	128.96	77.376	42.7135
																								#181-260	31oC	12 days	Etmoxior	6699	3235	136.23	81.738	39.5777
Fig S4A										x 500uL /1000 ; ug																		4517
		#200-125	37oC	37oC		octanoic acid	7248	6889	81.24	40.62	169.596																	2276
		#200-126	37oC	37oC		octanoic acid	8092	7733	80.13	40.065	193.011																	3599
		#200-127	37oC	37oC		octanoic acid	8400	8041	81.27	40.635	197.884																ave	3464
		#200-128	37oC	37oC		octanoic acid	8343	7984	83.21	41.605	191.9																	342160
		#200-129	37oC	37oC		octanoic acid	7905	7546	83.01	41.505	181.809																	357435
		#200-130	37oC	37oC		octanoic acid	7599	7240	83.09	41.545	174.269
		#200-131	37oC	37oC	Etmoxior	octanoic acid	6248	5889	85.43	42.715	137.867
		#200-132	37oC	37oC	Etmoxior	octanoic acid	6736	6377	82.61	41.305	154.388
		#200-133	37oC	37oC	Etmoxior	octanoic acid	6369	6010	87.61	43.805	137.199												0 day	0 day Et	1 day	1 day Et	4 day	4day Et	6 day	6 day Et	8 day	8 day Et	12 day	12 day Et
		#200-134	37oC	37oC	Etmoxior	octanoic acid	6345	5986	89.88	44.94	133.2												83.1838	18.5547	67.9006	17.5234	74.4996	18.111	156.547	38.0515	148.732	26.7696	214.526	45.511
		#200-135	37oC	37oC	Etmoxior	octanoic acid	6415	6056	89.5	44.75	135.33												68.7158	10.429	45.6953	-3.18171	80.4211	23.9464	139.88	15.6827	194.011	23.5586	197.86	34.7193
		#200-136	37oC	37oC	Etmoxior	octanoic acid	6654	6295	85.49	42.745	147.269												59.0642	10.0069	54.1911	-0.442842	85.4607	20.2681	107.815	16.679	146.097	25.2534	216.688	29.579
		#200-137	31oC	31oC		octanoic acid	10226	9867	88.44	44.22	223.134												87.1081	-0.0808904	58.0774	5.10364	86.4868	11.925	118.733	27.325	175.526	15.1073	186.066	42.7135
		#200-138	31oC	31oC		octanoic acid	9692	9333	93.5	46.75	199.636												88.6345	2.72612	58.6143	2.18017	77.7474	8.31009	115.143	21.5114	179.336	17.7016	189.804	39.5777
		#200-139	31oC	31oC		octanoic acid	10436	10077	92.74	46.37	217.317
		#200-140	31oC	31oC		octanoic acid	10643	10284	96.79	48.395	212.501											Column1
		#200-141	31oC	31oC		octanoic acid	10571	10212	89.41	44.705	228.431
		#200-142	31oC	31oC		octanoic acid	11045	10686	91.22	45.61	234.291											Mean	77.3413	8.32717	56.8957	4.23653	80.9231	16.5121	127.624	23.8499	168.741	21.6781	200.989	38.4201
		#200-143	31oC	31oC	Etmoxior	octanoic acid	7661	7302	93.36	46.68	156.427											Standard Error	5.76851	3.27039	3.5932	3.59478	2.27094	2.83061	8.9832	4.10705	9.24656	2.24978	6.27421	2.8453
		#200-144	31oC	31oC	Etmoxior	octanoic acid	7981	7622	96.21	48.105	158.445											Median	83.1838	10.0069	58.0774	2.18017	80.4211	18.111	118.733	21.5114	175.526	23.5586	197.86	39.5777
		#200-145	31oC	31oC	Etmoxior	octanoic acid	8801	8442	98.05	49.025	172.198											Mode	#N/A	#N/A	#N/A	#N/A	#N/A	#N/A	#N/A	#N/A	#N/A	#N/A	#N/A	#N/A
		#200-146	31oC	31oC	Etmoxior	octanoic acid	7577	7218	90.61	45.305	159.32											Standard Deviation	12.8988	7.31282	8.03464	8.03816	5.07797	6.32943	20.0871	9.18365	20.6759	5.03067	14.0296	6.36228
		#200-147	31oC	31oC	Etmoxior	octanoic acid	8414	8055	89.66	44.83	179.679											Sample Variance	166.379	53.4773	64.5554	64.6121	25.7858	40.0616	403.49	84.3394	427.495	25.3076	196.829	40.4787
		#200-148	31oC	31oC	Etmoxior	octanoic acid	9581	9222	98.13	49.065	187.955											Kurtosis	-1.51303	-0.590775	1.13899	2.3878	-2.00966	-1.59122	-1.03722	0.425735	-2.21548	-2.21899	-2.84822	-1.00665
																						Skewness	-0.810751	0.334262	-0.0685777	1.46569	-0.100398	-0.29635	0.802866	1.0651	-0.0933093	-0.530937	0.240936	-0.492673
																						Range	29.5703	18.6356	22.2053	20.7051	11.9872	15.6363	48.732	22.3688	47.9141	11.6623	30.6221	15.932
																						Minimum	59.0642	-0.0808904	45.6953	-3.18171	74.4996	8.31009	107.815	15.6827	146.097	15.1073	186.066	29.579
																						Maximum	88.6345	18.5547	67.9006	17.5234	86.4868	23.9464	156.547	38.0515	194.011	26.7696	216.688	45.511
										169.596	137.867	223.134	156.427									Sum	386.706	41.6359	284.479	21.1827	404.616	82.5606	638.119	119.25	843.703	108.391	1004.94	192.1
										193.011	154.388	199.636	158.445									Count	5	5	5	5	5	5	5	5	5	5	5	5
										197.884	137.199	217.317	172.198									Number of families	1
										191.9	133.2	212.501	159.32									Number of comparisons per family	66
										181.809	135.33	228.431	179.679					1.47719e+32				Alpha	0.05
										174.269	147.269	234.291	187.955
																						Tukey's multiple comparisons test	Mean Diff.	95.00% CI of diff.	Significant?	Summary	Adjusted P Value					Number of families	1
				Column1						Number of families	1																					Number of comparisons per family	66
										Number of comparisons per family	6											0 day vs. 0 day Et	69.01	43.99 to 94.03	Yes	****	<0.0001	A-B				Alpha	0.05
				Mean	184.745	140.875	219.218	169.004		Alpha	0.05											0 day vs. 1 day	20.45	-4.574 to 45.47	No	ns	0.2101	A-C
				Standard Error	4.61881	3.34516	5.03179	5.31268														0 day vs. 1 day Et	73.1	48.08 to 98.12	Yes	****	<0.0001	A-D				Tukey's multiple comparisons test	Mean Diff.	95.00% CI of diff.	Significant?	Summary	Adjusted P Value
				Median	186.855	137.533	220.226	165.759		Tukey's multiple comparisons test	Mean Diff.	95.00% CI of diff.	Significant?	Summary	Adjusted P Value							0 day vs. 4 day	-3.582	-28.6 to 21.44	No	ns	>0.9999	A-E				0 day vs. 0 day Et	69.01	43.99 to 94.03	Yes	****	<0.0001	A-B
				Mode	#N/A	#N/A	#N/A	#N/A														0 day vs. 4day Et	60.83	35.81 to 85.85	Yes	****	<0.0001	A-F				0 day vs. 1 day	20.45	-4.574 to 45.47	No	ns	0.2101	A-C
				Standard Deviation	11.3137	8.19393	12.3253	13.0134		37 vs. 37 Et	43.87	25.51 to 62.23	Yes	****	<0.0001	A-B						0 day vs. 6 day	-50.28	-75.3 to -25.26	Yes	****	<0.0001	A-G				0 day vs. 1 day Et	73.1	48.08 to 98.12	Yes	****	<0.0001	A-D
				Sample Variance	128	67.1405	151.914	169.348		37 vs. 31	-34.47	-52.83 to -16.11	Yes	***	0.0002	A-C						0 day vs. 6 day Et	53.49	28.47 to 78.51	Yes	****	<0.0001	A-H				0 day vs. 4 day	-3.582	-28.60 to 21.44	No	ns	>0.9999	A-E
				Kurtosis	-1.89763	-0.0864007	0.0631872	-1.65357		37 vs. 31 Et	15.74	-2.62 to 34.1	No	ns	0.1095	A-D						0 day vs. 8 day	-91.4	-116.4 to -66.38	Yes	****	<0.0001	A-I				0 day vs. 4day Et	60.83	35.81 to 85.85	Yes	****	<0.0001	A-F
				Skewness	-0.300819	1.10641	-0.569271	0.541815		37 Et vs. 31	-78.34	-96.7 to -59.98	Yes	****	<0.0001	B-C						0 day vs. 8 day Et	55.66	30.64 to 80.68	Yes	****	<0.0001	A-J				0 day vs. 6 day	-50.28	-75.30 to -25.26	Yes	****	<0.0001	A-G
				Range	28.2873	21.1883	34.6544	31.528		37 Et vs. 31 Et	-28.13	-46.49 to -9.767	Yes	**	0.0019	B-D						0 day vs. 12 day	-123.6	-148.7 to -98.63	Yes	****	<0.0001	A-K				0 day vs. 6 day Et	53.49	28.47 to 78.51	Yes	****	<0.0001	A-H
				Minimum	169.596	133.2	199.636	156.427		31 vs. 31 Et	50.21	31.85 to 68.58	Yes	****	<0.0001	C-D						0 day vs. 12 day Et	38.92	13.9 to 63.94	Yes	***	0.0001	A-L				0 day vs. 8 day	-91.4	-116.4 to -66.38	Yes	****	<0.0001	A-I
				Maximum	197.884	154.388	234.291	187.955														0 day Et vs. 1 day	-48.57	-73.59 to -23.55	Yes	****	<0.0001	B-C				0 day vs. 8 day Et	55.66	30.64 to 80.68	Yes	****	<0.0001	A-J
				Sum	1108.47	845.252	1315.31	1014.02														0 day Et vs. 1 day Et	4.091	-20.93 to 29.11	No	ns	>0.9999	B-D				0 day vs. 12 day	-123.6	-148.7 to -98.63	Yes	****	<0.0001	A-K
				Count	6	6	6	6		Test details	Mean 1	Mean 2	Mean Diff.	SE of diff.	n1	n2	q	DF				0 day Et vs. 4 day	-72.6	-97.62 to -47.58	Yes	****	<0.0001	B-E				0 day vs. 12 day Et	38.92	13.90 to 63.94	Yes	***	0.0001	A-L
					1.00798e-61																	0 day Et vs. 4day Et	-8.185	-33.2 to 16.84	No	ns	0.992	B-F				0 day Et vs. 1 day	-48.57	-73.59 to -23.55	Yes	****	<0.0001	B-C
										37 vs. 37 Et	184.7	140.9	43.87	6.56	6	6	9.457	20				0 day Et vs. 6 day	-119.3	-144.3 to -94.28	Yes	****	<0.0001	B-G				0 day Et vs. 1 day Et	4.091	-20.93 to 29.11	No	ns	>0.9999	B-D
										37 vs. 31	184.7	219.2	-34.47	6.56	6	6	7.432	20				0 day Et vs. 6 day Et	-15.52	-40.54 to 9.497	No	ns	0.6047	B-H				0 day Et vs. 4 day	-72.6	-97.62 to -47.58	Yes	****	<0.0001	B-E
										37 vs. 31 Et	184.7	169	15.74	6.56	6	6	3.393	20				0 day Et vs. 8 day	-160.4	-185.4 to -135.4	Yes	****	<0.0001	B-I				0 day Et vs. 4day Et	-8.185	-33.20 to 16.84	No	ns	0.992	B-F
										37 Et vs. 31	140.9	219.2	-78.34	6.56	6	6	16.89	20				0 day Et vs. 8 day Et	-13.35	-38.37 to 11.67	No	ns	0.7924	B-J				0 day Et vs. 6 day	-119.3	-144.3 to -94.28	Yes	****	<0.0001	B-G
										37 Et vs. 31 Et	140.9	169	-28.13	6.56	6	6	6.064	20				0 day Et vs. 12 day	-192.7	-217.7 to -167.6	Yes	****	<0.0001	B-K				0 day Et vs. 6 day Et	-15.52	-40.54 to 9.497	No	ns	0.6047	B-H
										31 vs. 31 Et	219.2	169	50.21	6.56	6	6	10.83	20				0 day Et vs. 12 day Et	-30.09	-55.11 to -5.073	Yes	**	0.0072	B-L				0 day Et vs. 8 day	-160.4	-185.4 to -135.4	Yes	****	<0.0001	B-I
																						1 day vs. 1 day Et	52.66	27.64 to 77.68	Yes	****	<0.0001	C-D				0 day Et vs. 8 day Et	-13.35	-38.37 to 11.67	No	ns	0.7924	B-J
																						1 day vs. 4 day	-24.03	-49.05 to 0.9926	No	ns	0.0703	C-E				0 day Et vs. 12 day	-192.7	-217.7 to -167.6	Yes	****	<0.0001	B-K
																						1 day vs. 4day Et	40.38	15.36 to 65.4	Yes	****	<0.0001	C-F				0 day Et vs. 12 day Et	-30.09	-55.11 to -5.073	Yes	**	0.0072	B-L
																						1 day vs. 6 day	-70.73	-95.75 to -45.71	Yes	****	<0.0001	C-G				1 day vs. 1 day Et	52.66	27.64 to 77.68	Yes	****	<0.0001	C-D
																						1 day vs. 6 day Et	33.05	8.026 to 58.07	Yes	**	0.0021	C-H				1 day vs. 4 day	-24.03	-49.05 to 0.9926	No	ns	0.0703	C-E
																						1 day vs. 8 day	-111.8	-136.9 to -86.82	Yes	****	<0.0001	C-I				1 day vs. 4day Et	40.38	15.36 to 65.40	Yes	****	<0.0001	C-F
																						1 day vs. 8 day Et	35.22	10.2 to 60.24	Yes	***	0.0008	C-J				1 day vs. 6 day	-70.73	-95.75 to -45.71	Yes	****	<0.0001	C-G
																						1 day vs. 12 day	-144.1	-169.1 to -119.1	Yes	****	<0.0001	C-K				1 day vs. 6 day Et	33.05	8.026 to 58.07	Yes	**	0.0021	C-H
																						1 day vs. 12 day Et	18.48	-6.544 to 43.5	No	ns	0.3439	C-L				1 day vs. 8 day	-111.8	-136.9 to -86.82	Yes	****	<0.0001	C-I
																						1 day Et vs. 4 day	-76.69	-101.7 to -51.67	Yes	****	<0.0001	D-E				1 day vs. 8 day Et	35.22	10.20 to 60.24	Yes	***	0.0008	C-J
																						1 day Et vs. 4day Et	-12.28	-37.3 to 12.74	No	ns	0.8662	D-F				1 day vs. 12 day	-144.1	-169.1 to -119.1	Yes	****	<0.0001	C-K
																						1 day Et vs. 6 day	-123.4	-148.4 to -98.37	Yes	****	<0.0001	D-G				1 day vs. 12 day Et	18.48	-6.544 to 43.50	No	ns	0.3439	C-L
																						1 day Et vs. 6 day Et	-19.61	-44.63 to 5.407	No	ns	0.2614	D-H				1 day Et vs. 4 day	-76.69	-101.7 to -51.67	Yes	****	<0.0001	D-E
																						1 day Et vs. 8 day	-164.5	-189.5 to -139.5	Yes	****	<0.0001	D-I				1 day Et vs. 4day Et	-12.28	-37.30 to 12.74	No	ns	0.8662	D-F
																						1 day Et vs. 8 day Et	-17.44	-42.46 to 7.578	No	ns	0.4296	D-J				1 day Et vs. 6 day	-123.4	-148.4 to -98.37	Yes	****	<0.0001	D-G
																						1 day Et vs. 12 day	-196.8	-221.8 to -171.7	Yes	****	<0.0001	D-K				1 day Et vs. 6 day Et	-19.61	-44.63 to 5.407	No	ns	0.2614	D-H
																						1 day Et vs. 12 day Et	-34.18	-59.2 to -9.164	Yes	**	0.0013	D-L				1 day Et vs. 8 day	-164.5	-189.5 to -139.5	Yes	****	<0.0001	D-I
																						4 day vs. 4day Et	64.41	39.39 to 89.43	Yes	****	<0.0001	E-F				1 day Et vs. 8 day Et	-17.44	-42.46 to 7.578	No	ns	0.4296	D-J
																						4 day vs. 6 day	-46.7	-71.72 to -21.68	Yes	****	<0.0001	E-G				1 day Et vs. 12 day	-196.8	-221.8 to -171.7	Yes	****	<0.0001	D-K
																						4 day vs. 6 day Et	57.07	32.05 to 82.09	Yes	****	<0.0001	E-H				1 day Et vs. 12 day Et	-34.18	-59.20 to -9.164	Yes	**	0.0013	D-L
																						4 day vs. 8 day	-87.82	-112.8 to -62.8	Yes	****	<0.0001	E-I				4 day vs. 4day Et	64.41	39.39 to 89.43	Yes	****	<0.0001	E-F
																						4 day vs. 8 day Et	59.25	34.22 to 84.27	Yes	****	<0.0001	E-J				4 day vs. 6 day	-46.7	-71.72 to -21.68	Yes	****	<0.0001	E-G
																						4 day vs. 12 day	-120.1	-145.1 to -95.05	Yes	****	<0.0001	E-K				4 day vs. 6 day Et	57.07	32.05 to 82.09	Yes	****	<0.0001	E-H
																						4 day vs. 12 day Et	42.5	17.48 to 67.52	Yes	****	<0.0001	E-L				4 day vs. 8 day	-87.82	-112.8 to -62.80	Yes	****	<0.0001	E-I
																						4day Et vs. 6 day	-111.1	-136.1 to -86.09	Yes	****	<0.0001	F-G				4 day vs. 8 day Et	59.25	34.22 to 84.27	Yes	****	<0.0001	E-J
																						4day Et vs. 6 day Et	-7.338	-32.36 to 17.68	No	ns	0.9968	F-H				4 day vs. 12 day	-120.1	-145.1 to -95.05	Yes	****	<0.0001	E-K
																						4day Et vs. 8 day	-152.2	-177.2 to -127.2	Yes	****	<0.0001	F-I				4 day vs. 12 day Et	42.5	17.48 to 67.52	Yes	****	<0.0001	E-L
																						4day Et vs. 8 day Et	-5.166	-30.19 to 19.85	No	ns	0.9999	F-J				4day Et vs. 6 day	-111.1	-136.1 to -86.09	Yes	****	<0.0001	F-G
																						4day Et vs. 12 day	-184.5	-209.5 to -159.5	Yes	****	<0.0001	F-K				4day Et vs. 6 day Et	-7.338	-32.36 to 17.68	No	ns	0.9968	F-H
																						4day Et vs. 12 day Et	-21.91	-46.93 to 3.112	No	ns	0.1383	F-L				4day Et vs. 8 day	-152.2	-177.2 to -127.2	Yes	****	<0.0001	F-I
																						6 day vs. 6 day Et	103.8	78.75 to 128.8	Yes	****	<0.0001	G-H				4day Et vs. 8 day Et	-5.166	-30.19 to 19.85	No	ns	0.9999	F-J
																						6 day vs. 8 day	-41.12	-66.14 to -16.1	Yes	****	<0.0001	G-I				4day Et vs. 12 day	-184.5	-209.5 to -159.5	Yes	****	<0.0001	F-K
																						6 day vs. 8 day Et	105.9	80.93 to 131	Yes	****	<0.0001	G-J				4day Et vs. 12 day Et	-21.91	-46.93 to 3.112	No	ns	0.1383	F-L
																						6 day vs. 12 day	-73.37	-98.39 to -48.35	Yes	****	<0.0001	G-K				6 day vs. 6 day Et	103.8	78.75 to 128.8	Yes	****	<0.0001	G-H
																						6 day vs. 12 day Et	89.2	64.18 to 114.2	Yes	****	<0.0001	G-L				6 day vs. 8 day	-41.12	-66.14 to -16.10	Yes	****	<0.0001	G-I
																						6 day Et vs. 8 day	-144.9	-169.9 to -119.9	Yes	****	<0.0001	H-I				6 day vs. 8 day Et	105.9	80.93 to 131.0	Yes	****	<0.0001	G-J
																						6 day Et vs. 8 day Et	2.172	-22.85 to 27.19	No	ns	>0.9999	H-J				6 day vs. 12 day	-73.37	-98.39 to -48.35	Yes	****	<0.0001	G-K
																						6 day Et vs. 12 day	-177.1	-202.2 to -152.1	Yes	****	<0.0001	H-K				6 day vs. 12 day Et	89.2	64.18 to 114.2	Yes	****	<0.0001	G-L
																						6 day Et vs. 12 day Et	-14.57	-39.59 to 10.45	No	ns	0.6913	H-L				6 day Et vs. 8 day	-144.9	-169.9 to -119.9	Yes	****	<0.0001	H-I
																						8 day vs. 8 day Et	147.1	122 to 172.1	Yes	****	<0.0001	I-J				6 day Et vs. 8 day Et	2.172	-22.85 to 27.19	No	ns	>0.9999	H-J
																						8 day vs. 12 day	-32.25	-57.27 to -7.228	Yes	**	0.0029	I-K				6 day Et vs. 12 day	-177.1	-202.2 to -152.1	Yes	****	<0.0001	H-K
																						8 day vs. 12 day Et	130.3	105.3 to 155.3	Yes	****	<0.0001	I-L				6 day Et vs. 12 day Et	-14.57	-39.59 to 10.45	No	ns	0.6913	H-L
																						8 day Et vs. 12 day	-179.3	-204.3 to -154.3	Yes	****	<0.0001	J-K				8 day vs. 8 day Et	147.1	122.0 to 172.1	Yes	****	<0.0001	I-J
																						8 day Et vs. 12 day Et	-16.74	-41.76 to 8.278	No	ns	0.4921	J-L				8 day vs. 12 day	-32.25	-57.27 to -7.228	Yes	**	0.0029	I-K
																						12 day vs. 12 day Et	162.6	137.5 to 187.6	Yes	****	<0.0001	K-L				8 day vs. 12 day Et	130.3	105.3 to 155.3	Yes	****	<0.0001	I-L
																																8 day Et vs. 12 day	-179.3	-204.3 to -154.3	Yes	****	<0.0001	J-K
																																8 day Et vs. 12 day Et	-16.74	-41.76 to 8.278	No	ns	0.4921	J-L
																																12 day vs. 12 day Et	162.6	137.5 to 187.6	Yes	****	<0.0001	K-L
